# Supplementary material for: Stereoselective synthesis of (E)-3,3-diaryl and (E)-3-aryl-3-aryloxy allylamines and allylalcohols from trans-cinnamyl chloride and alcohol
Source: Royal Society of Chemistry journal article supplement (doi:10.1039/c4ra08036j), 2014-01-01
Supplement: c4ra08036j1.pdf [file c4ra08036j1.pdf]

Supporting Information for

## **Stereoselective Synthesis of (*E*)-3,3-diaryl and (*E*)-3-aryl-3-aryloxy Allylamines and Allylalcohols from *trans*-Cinnamyl chloride and alcohol**

Jones Limberger, Thiago S. Claudino and Adriano L. Monteiro\*

Laboratory of Molecular Catalysis. Instituto de Química – UFRGS. Av. Bento Gonçalves, 9500; Porto Alegre 91501-970 – CP 15003, RS, Brazil.

|                                                                                                    |            |
|----------------------------------------------------------------------------------------------------|------------|
| <b>1. Dehydrobromination optimization</b>                                                          | <b>S2</b>  |
| <b>2. <sup>1</sup>H-NMR and <sup>13</sup>C-NMR Compounds Spectra</b>                               | <b>S3</b>  |
| <b>3. NOE Experiments For determination of (<i>E</i>)-Configuration of Trissubstitued Products</b> | <b>S28</b> |

## 1. Dehydrobromination optimization

**Table S1: Optimization of 4a dehydrobromination conditions**

| Entry          | Temp. (°C) | Solvent  | Base                           | Conversion (%) | Seletivity 5a (%) |
|----------------|------------|----------|--------------------------------|----------------|-------------------|
| 1 <sup>a</sup> | 60         | MeOH/THF | K <sub>2</sub> CO <sub>3</sub> | 39             | 72                |
| 2 <sup>a</sup> | 60         | THF/MeOH | KOH                            | 33             | 76                |
| 3 <sup>a</sup> | 60         | THF      | K <sub>2</sub> CO <sub>3</sub> | 38             | 51                |
| 4 <sup>a</sup> | 60         | THF      | KOH                            | 37             | 53                |
| 5 <sup>a</sup> | 25         | THF      | KOH                            | 40             | 98                |
| 6 <sup>b</sup> | 35         | THF      | KOH                            | 100            | 97 (88)           |

Conditions: **4a** (1 mmol), base (2 mmol), solvent (8 ml). Internal standard: undecane. <sup>a</sup> 16 h, <sup>b</sup> 48 h. the value in brackets corresponds to isolated yield. Conversion determined by <sup>1</sup>H-NMR and the isomer distribution (selectivity) determined by GC and GC-MS.

## 2. $^1\text{H-NMR}$ and $^{13}\text{C-NMR}$ Compounds Spectra

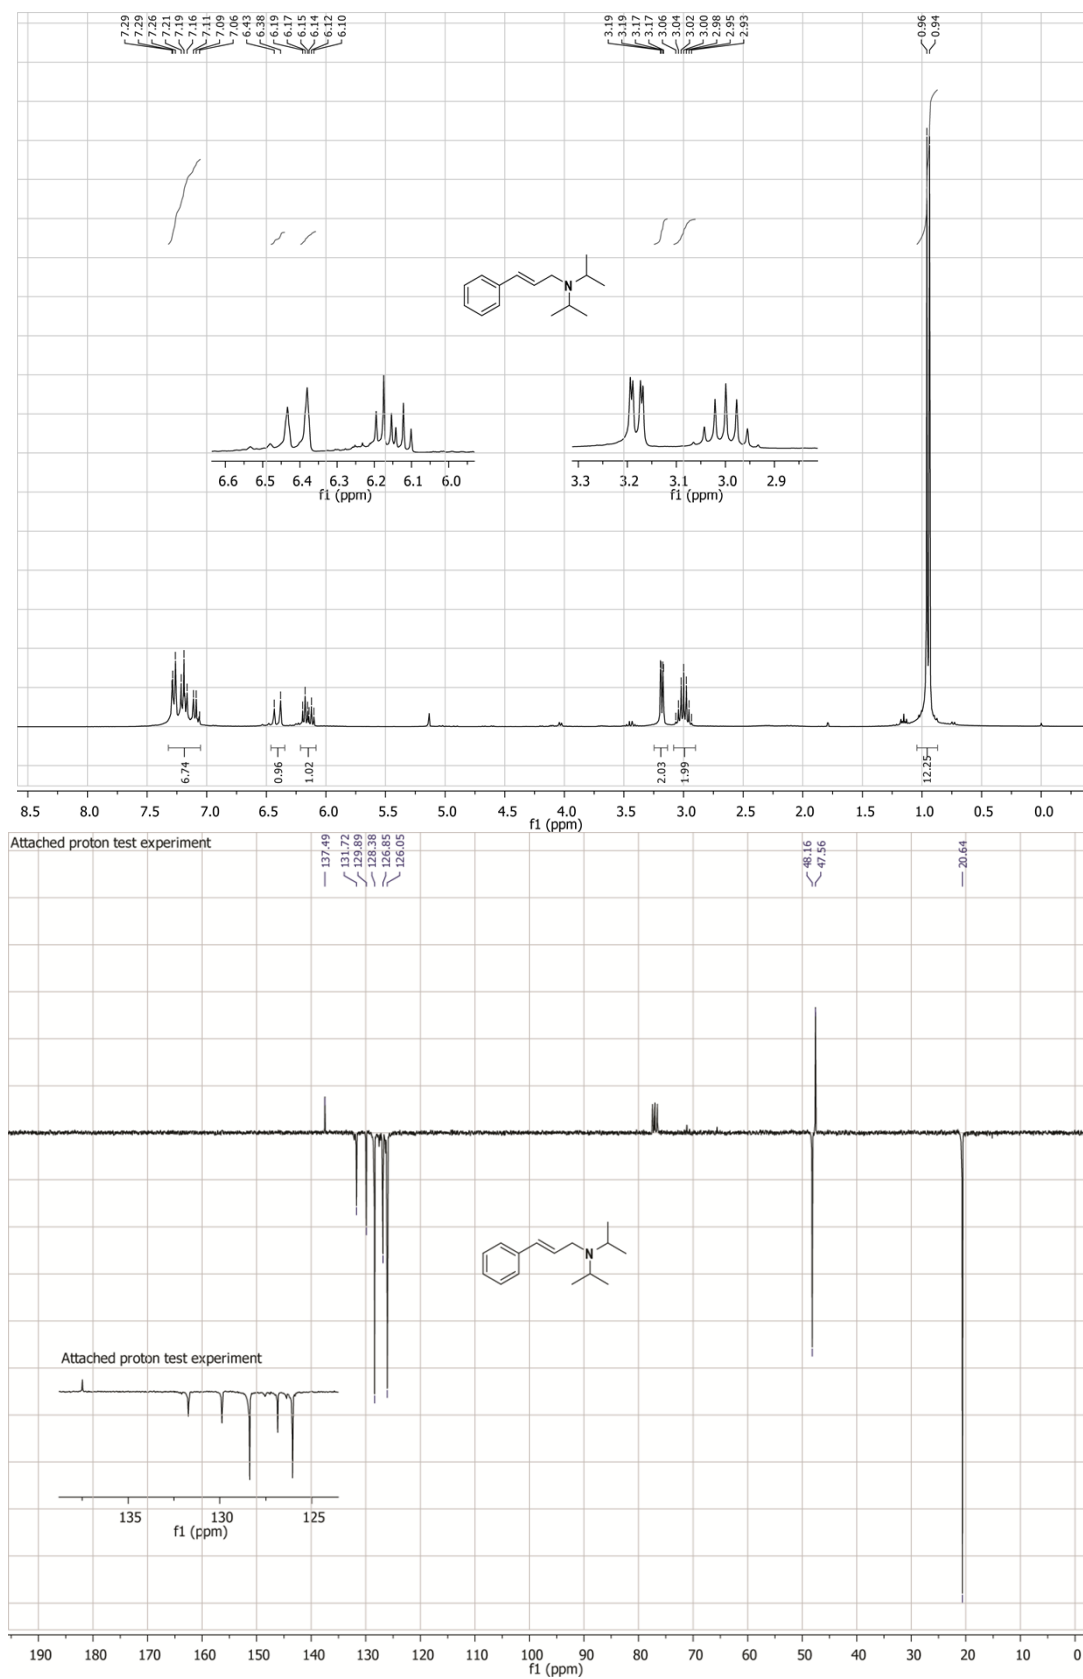

Compound 3a

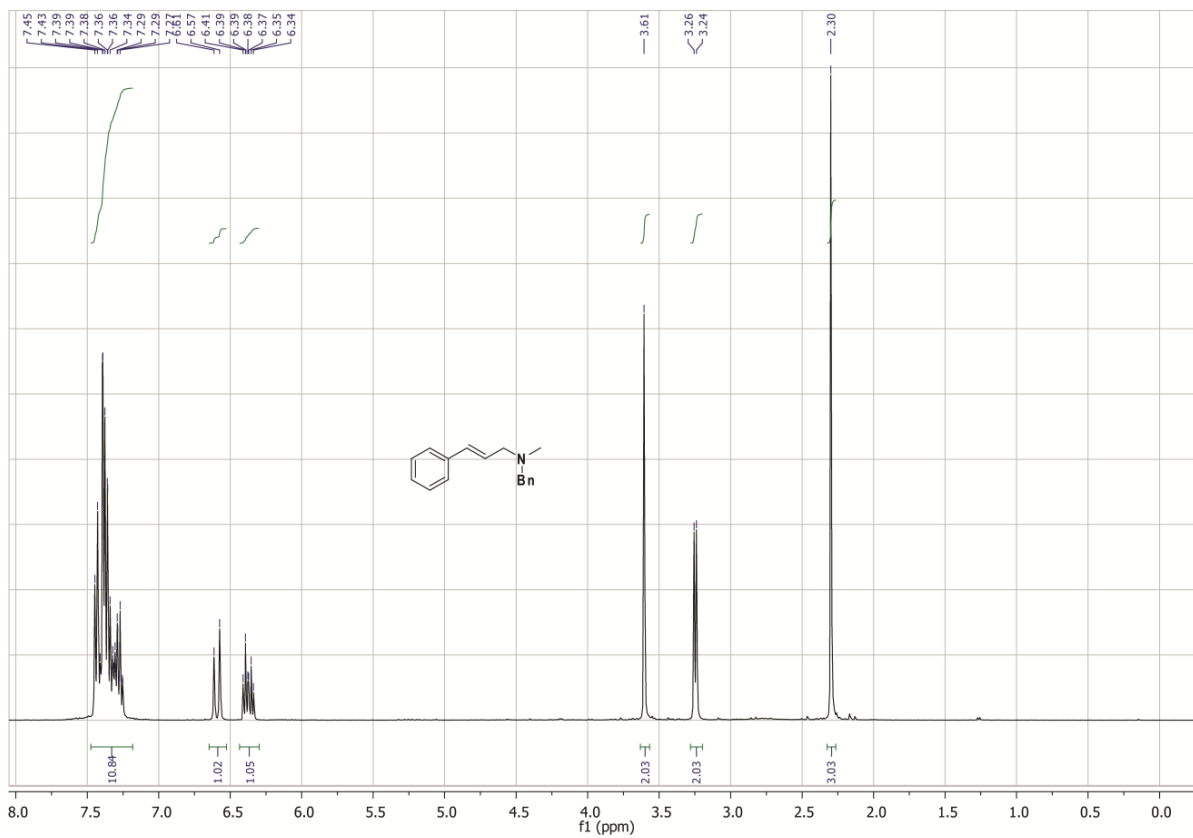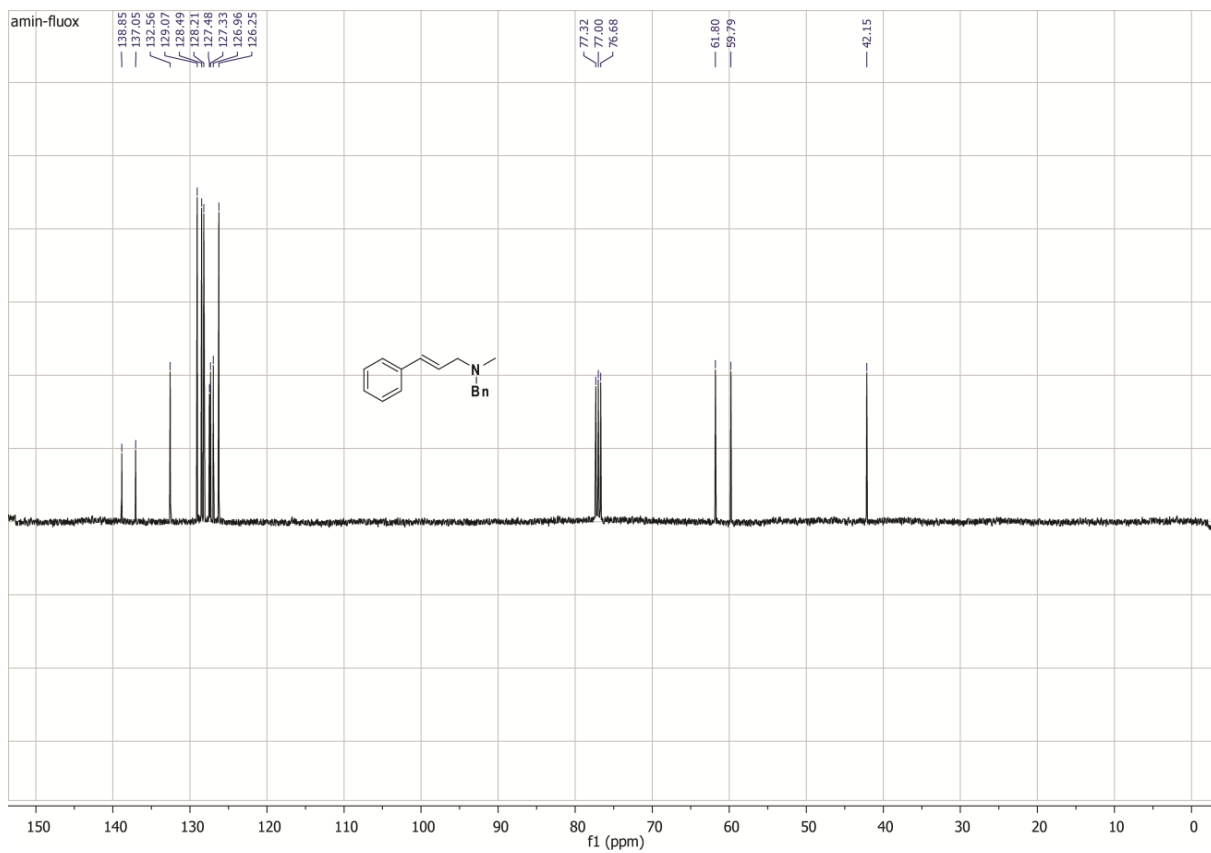

Compound 3b

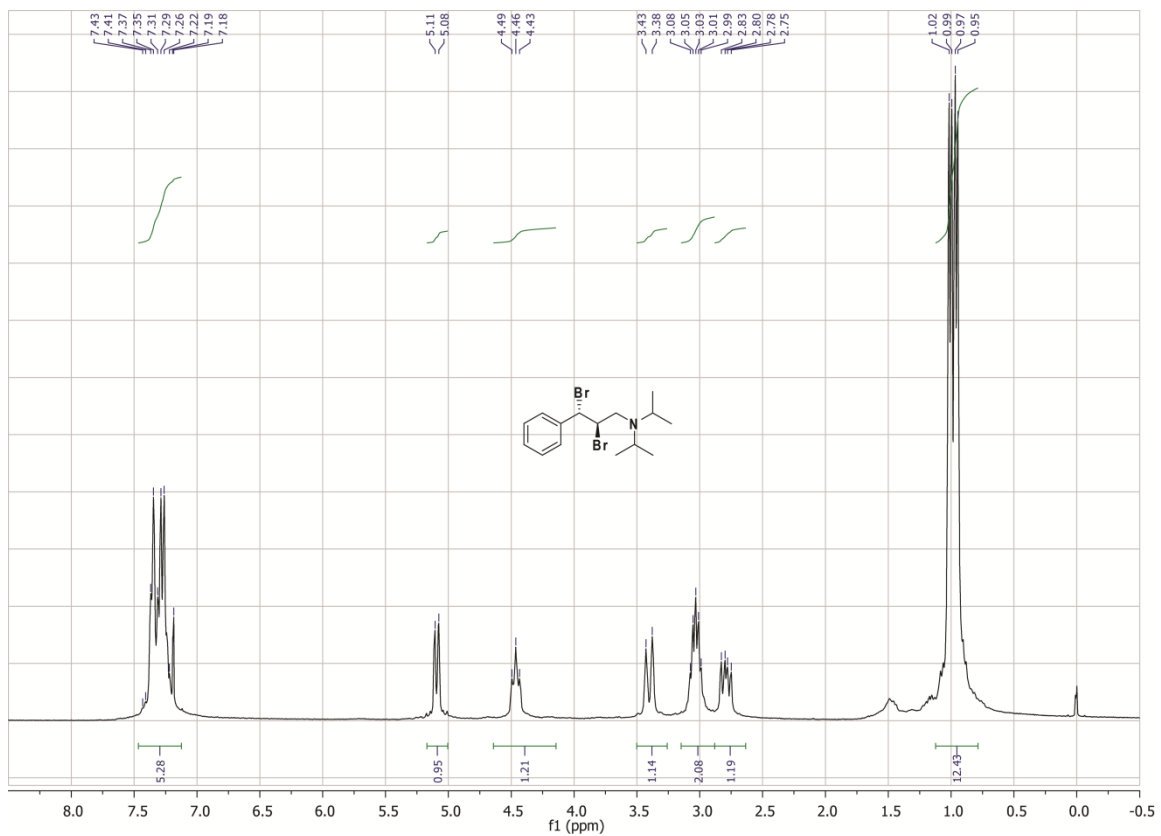

Compound 4a

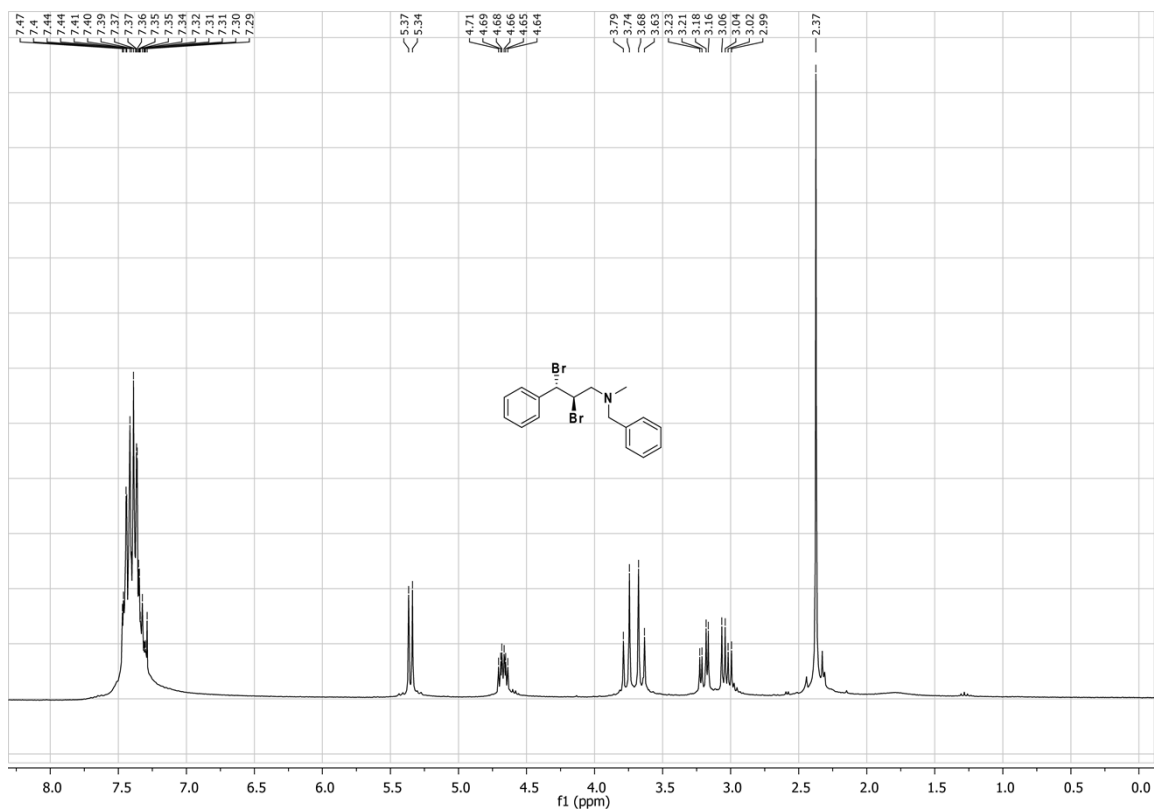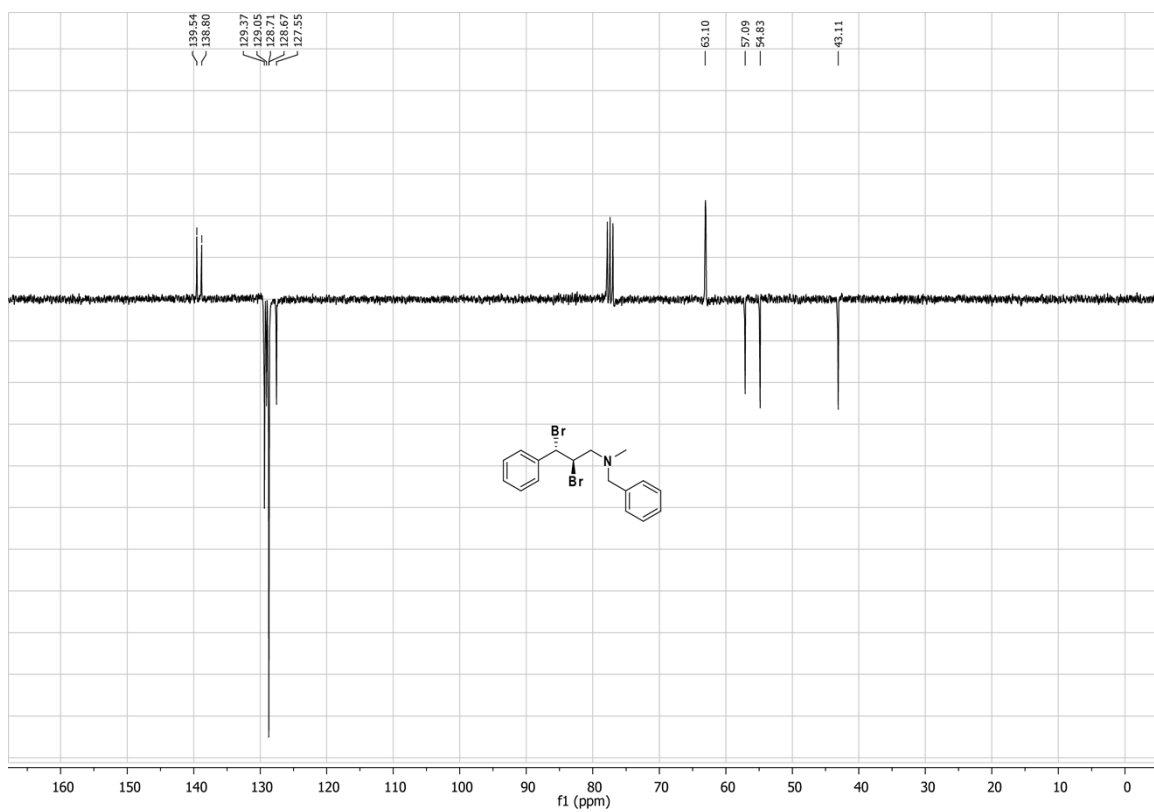

Compound 4b

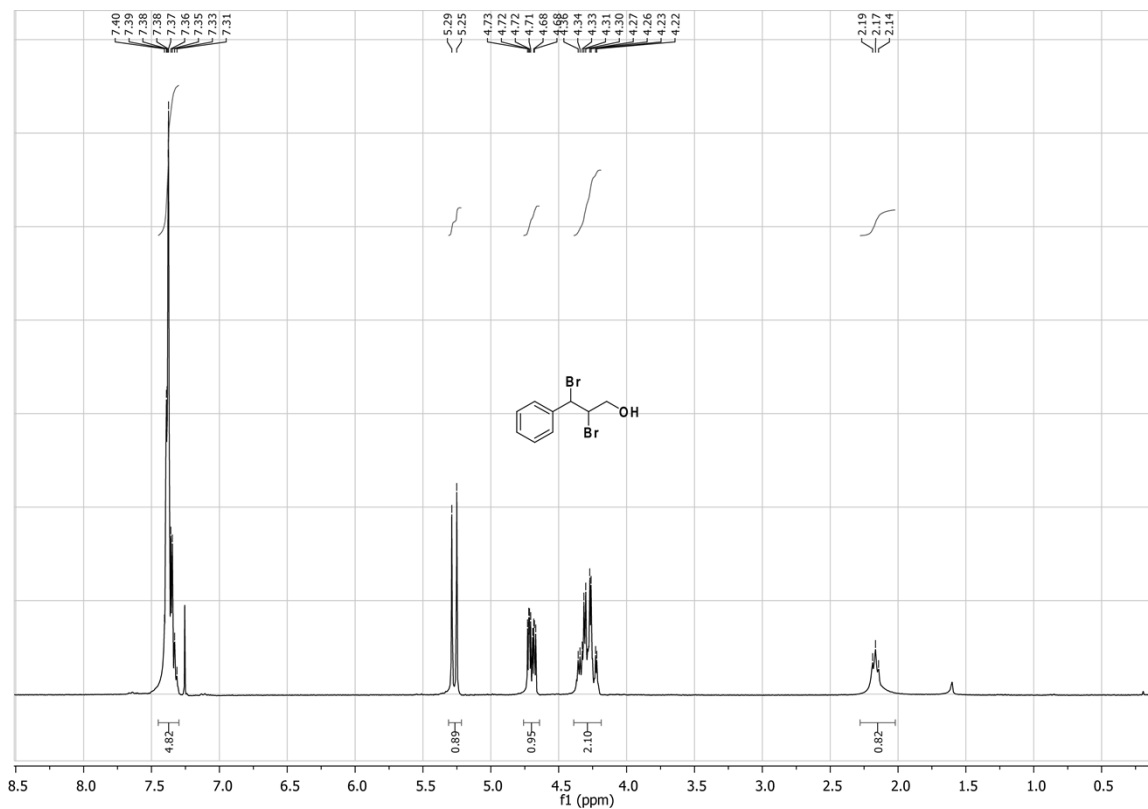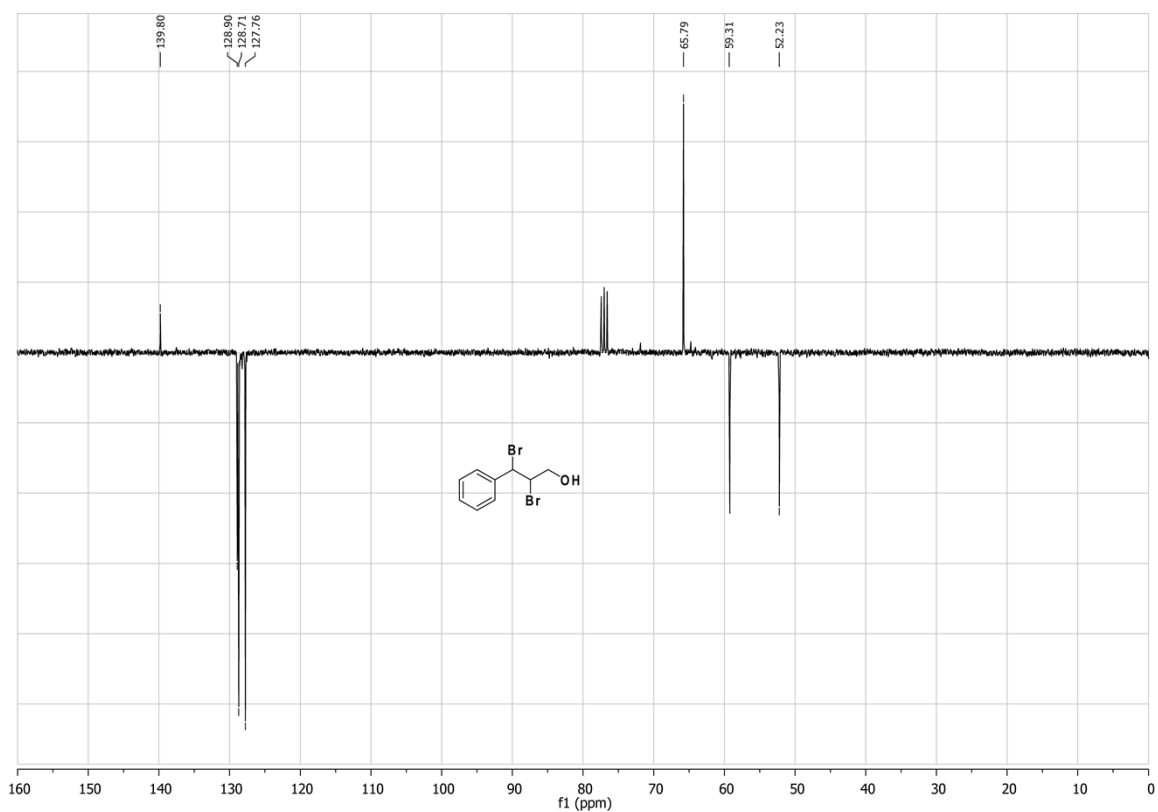

Compound 4c

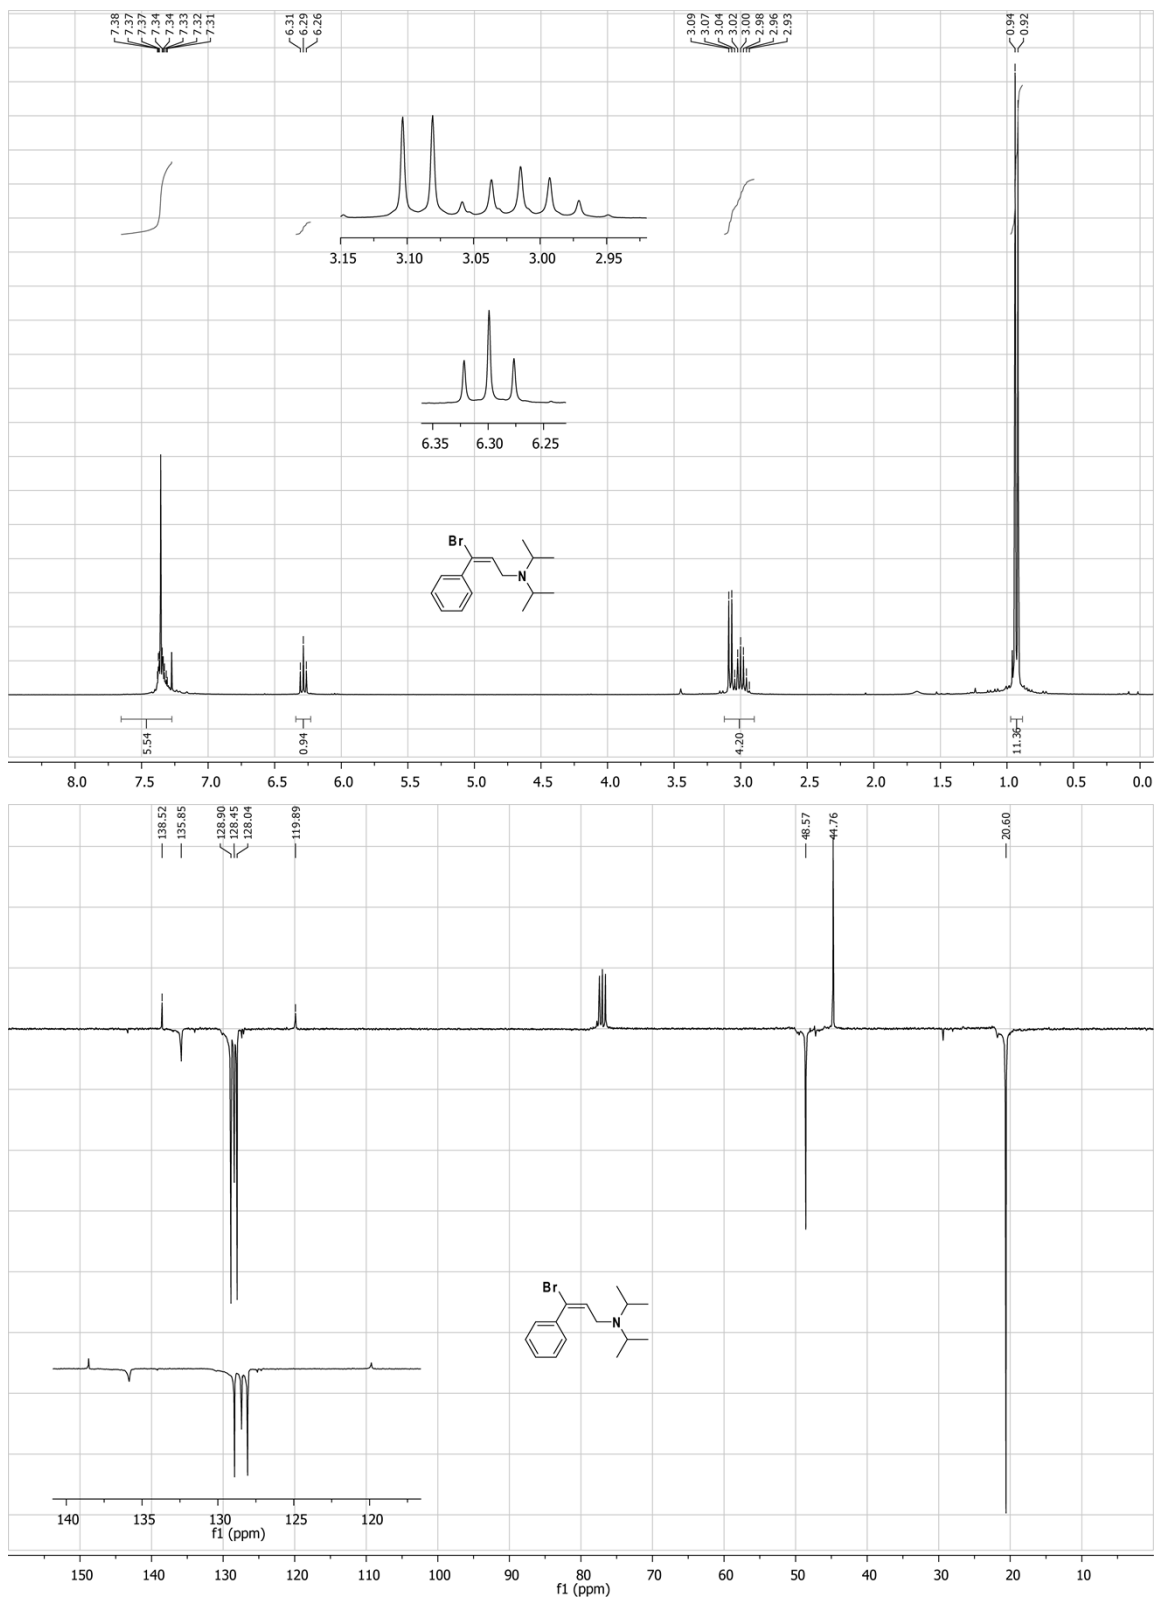

Compound 5a



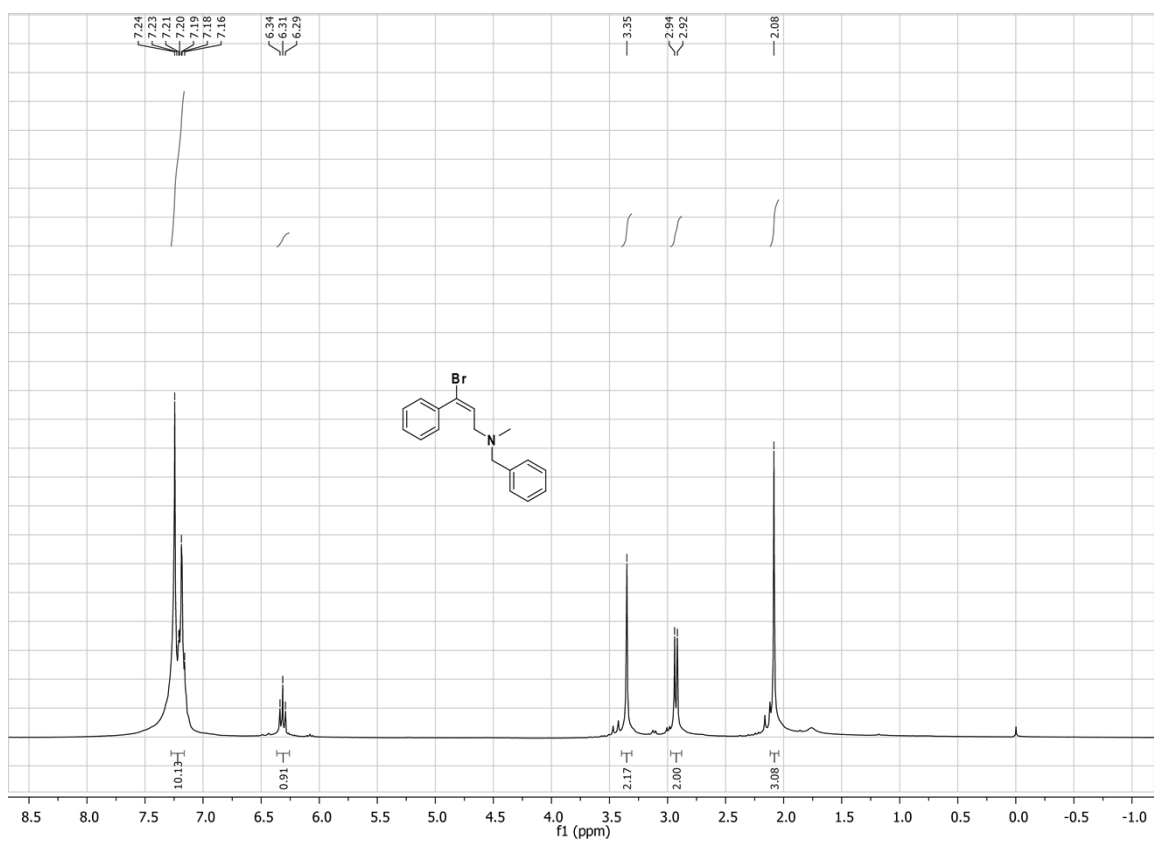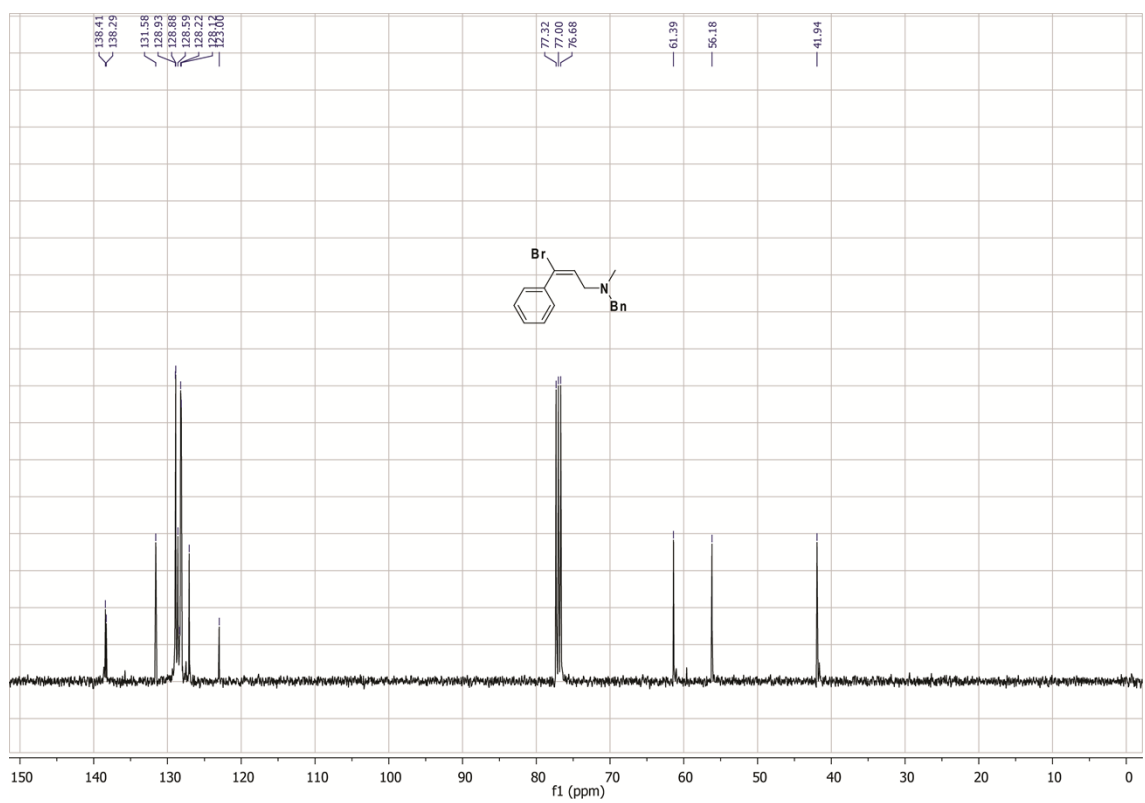

Compound 5b

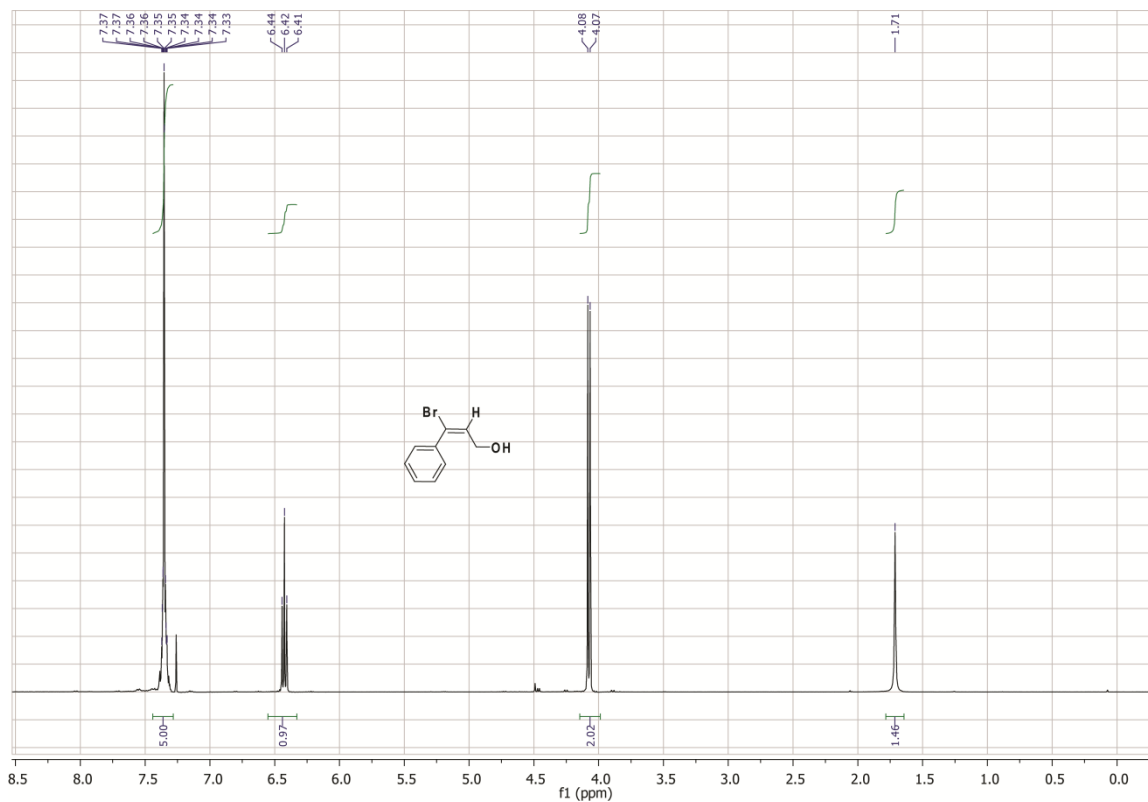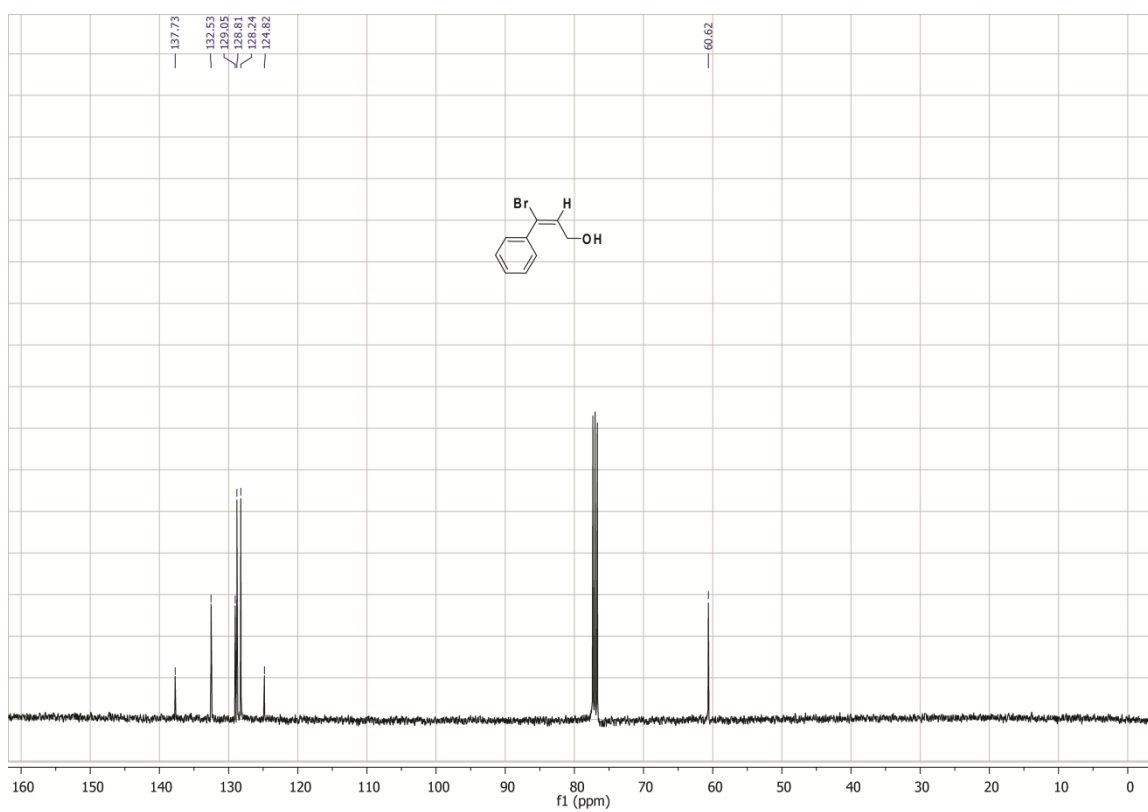

Compound 5c

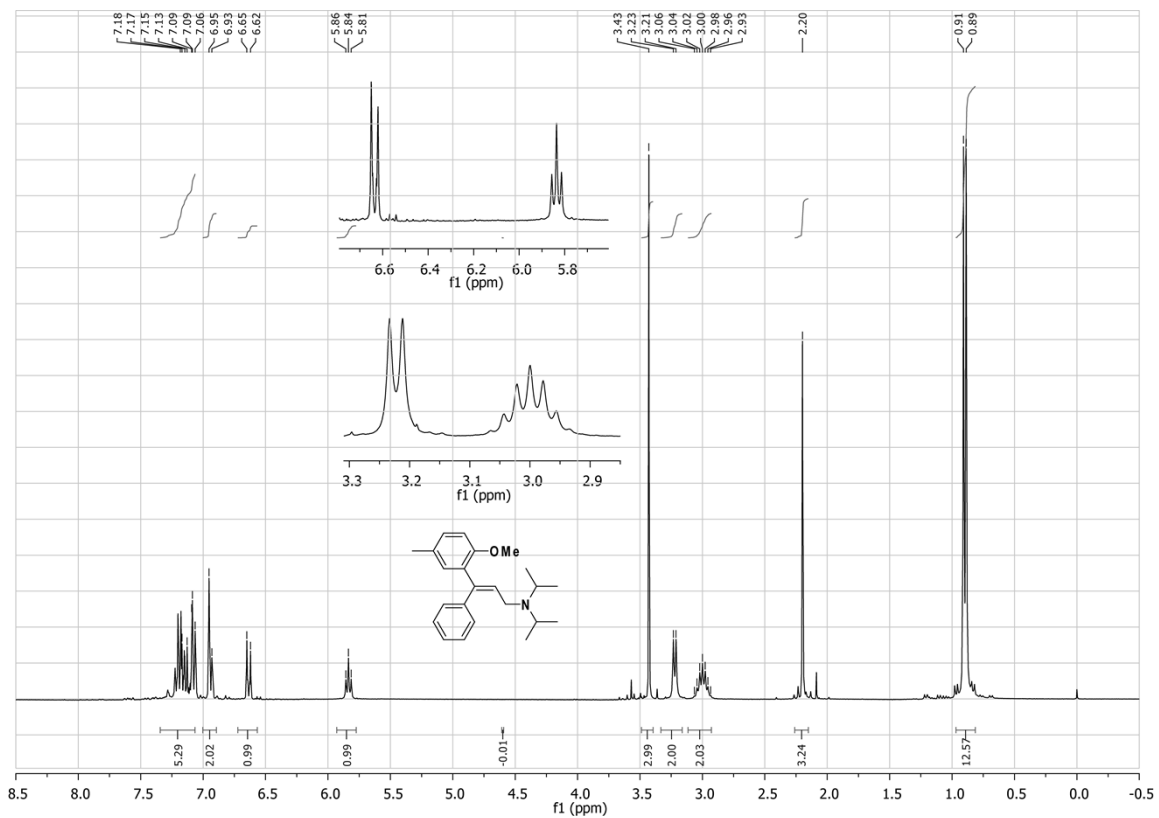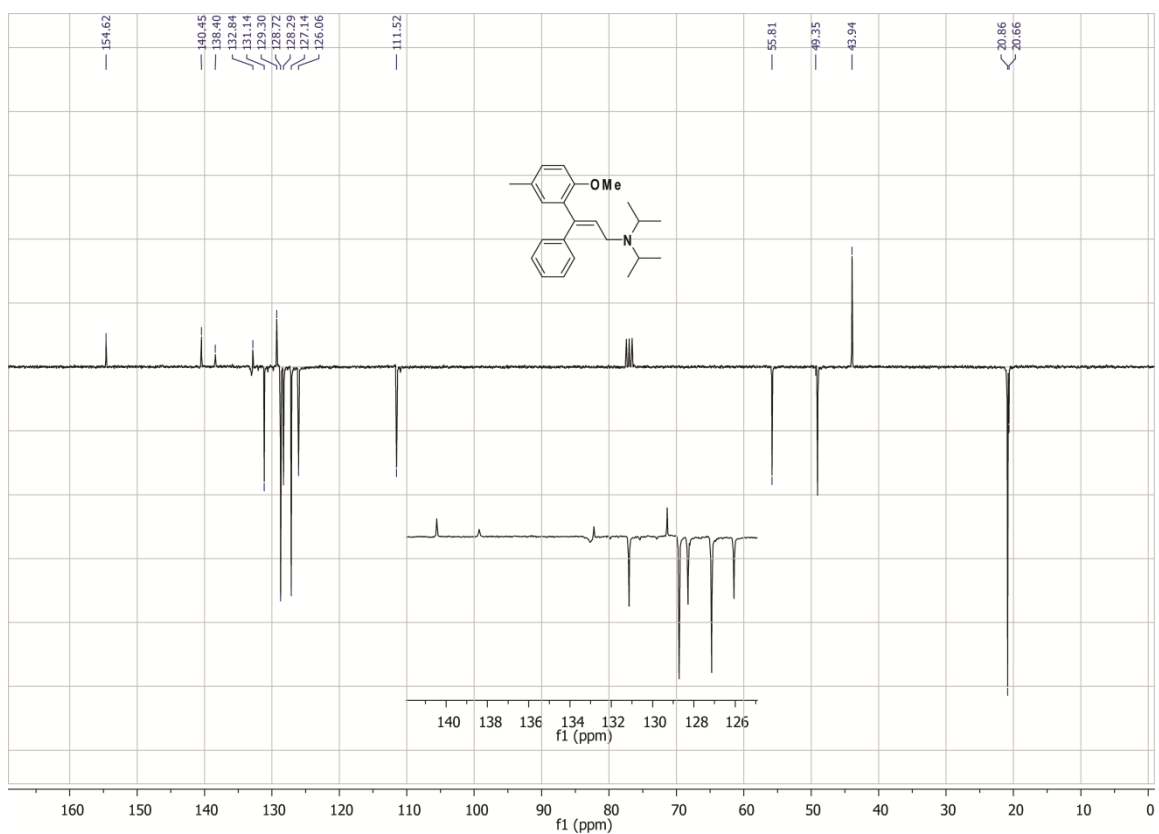

Compound 6a

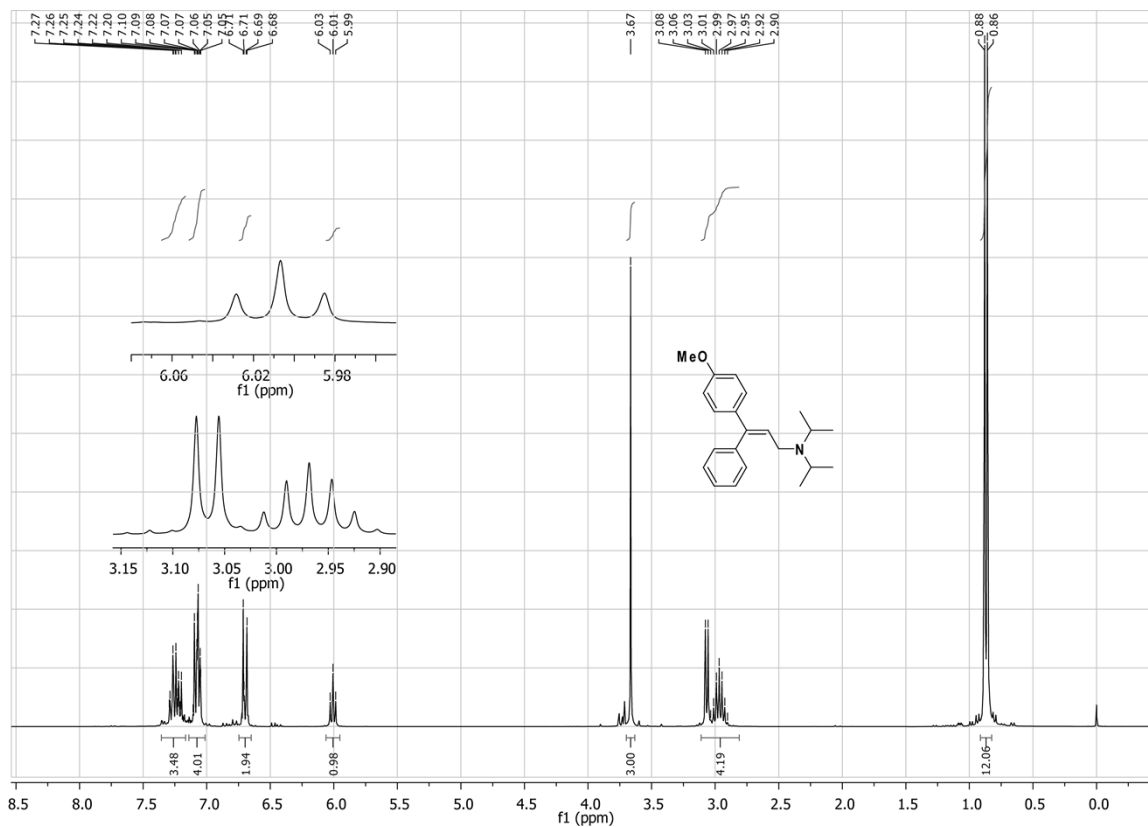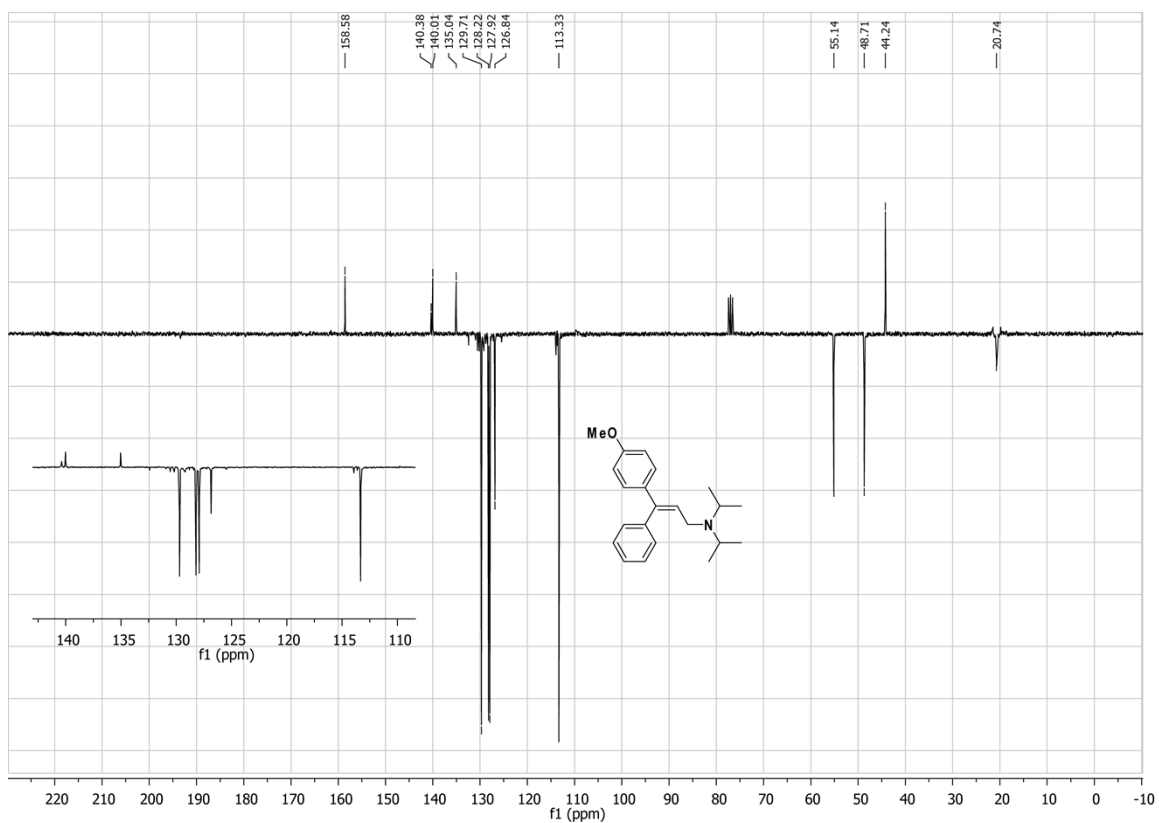

Compound 7a

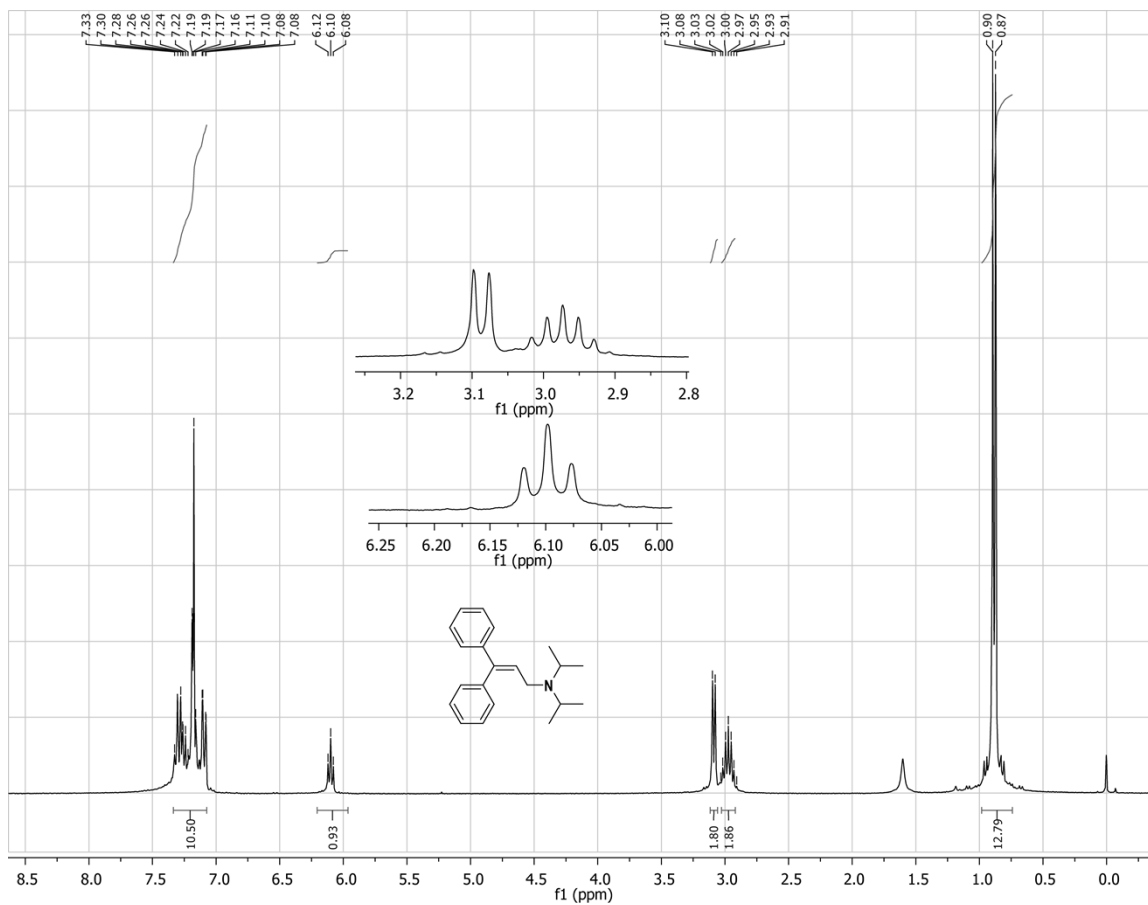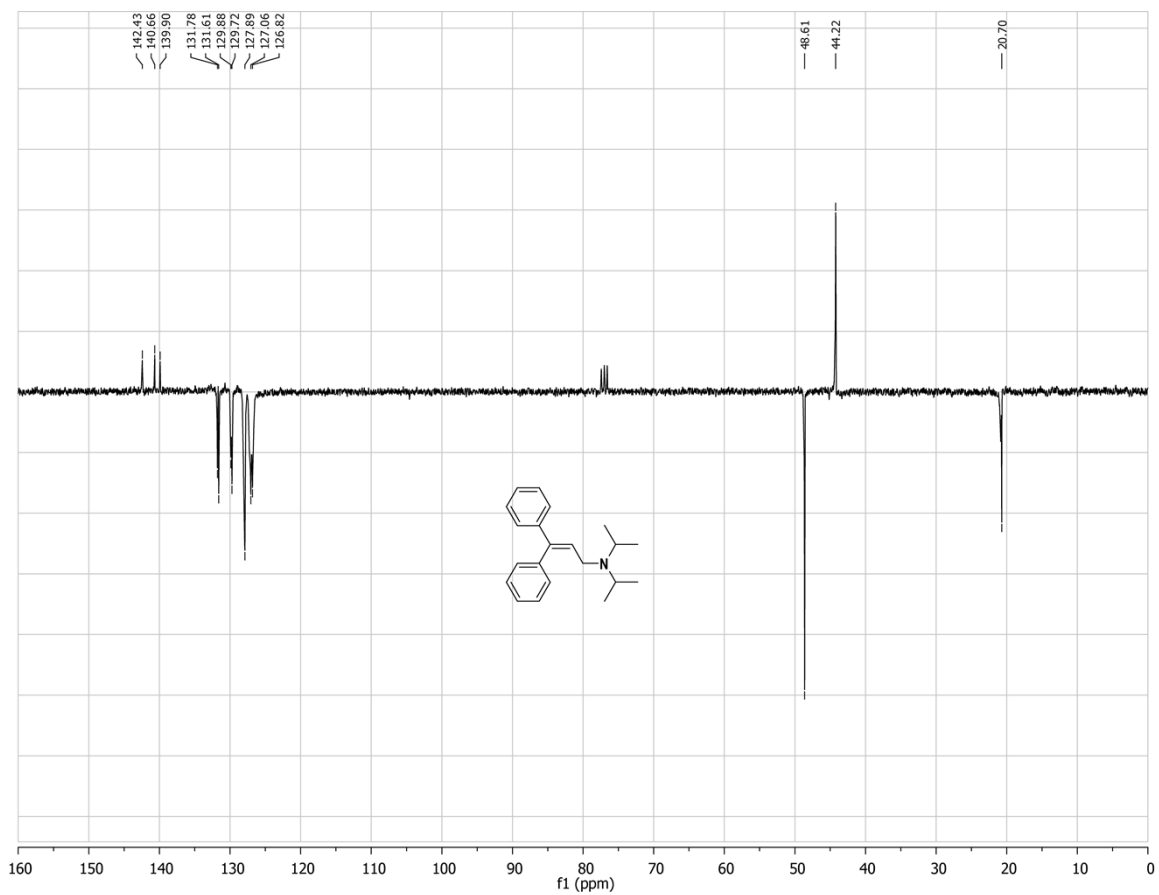

Compound 8a

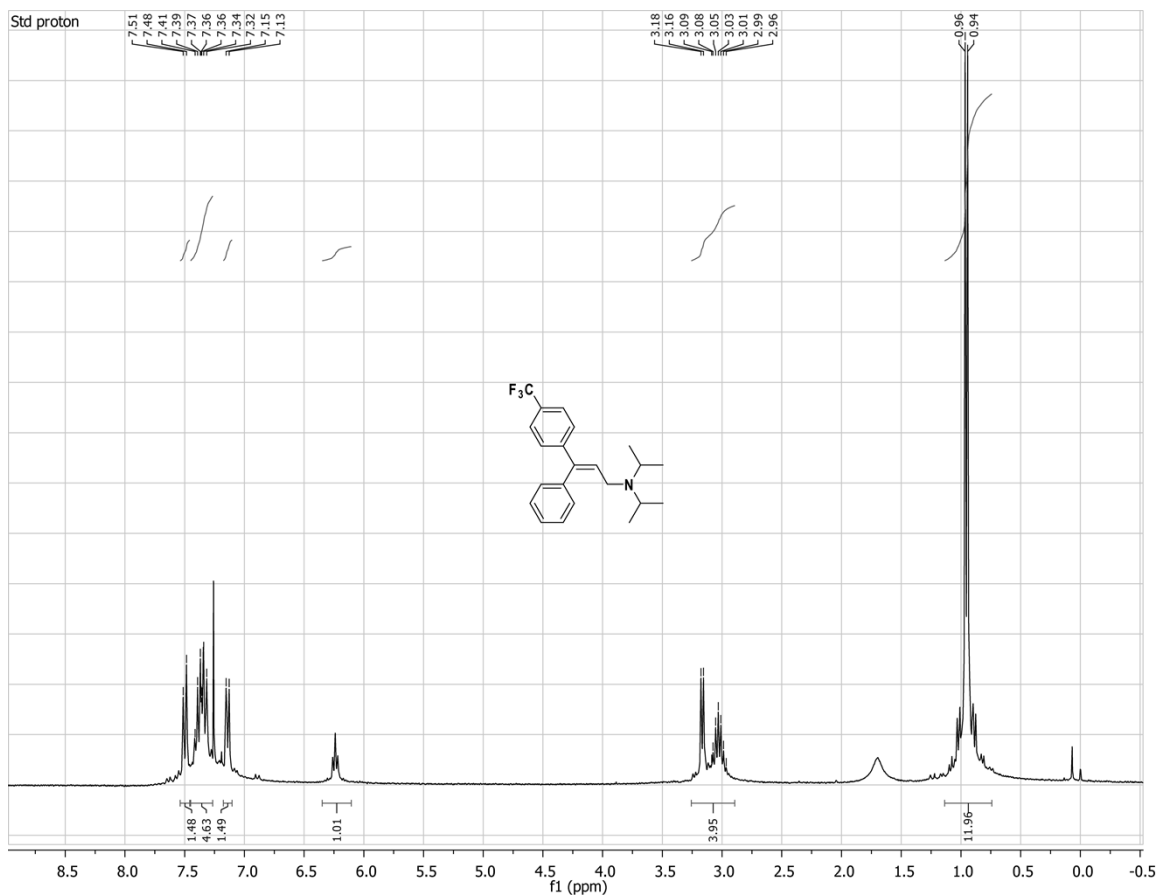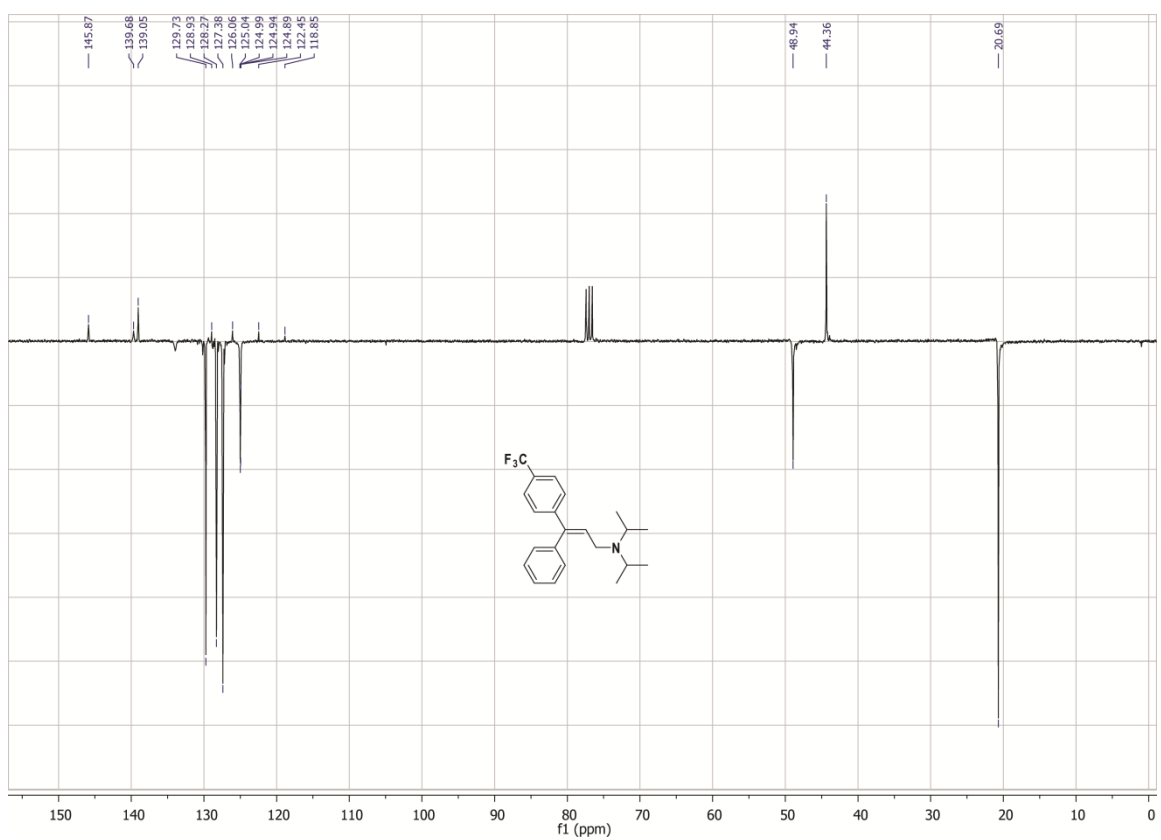

Compound 9a

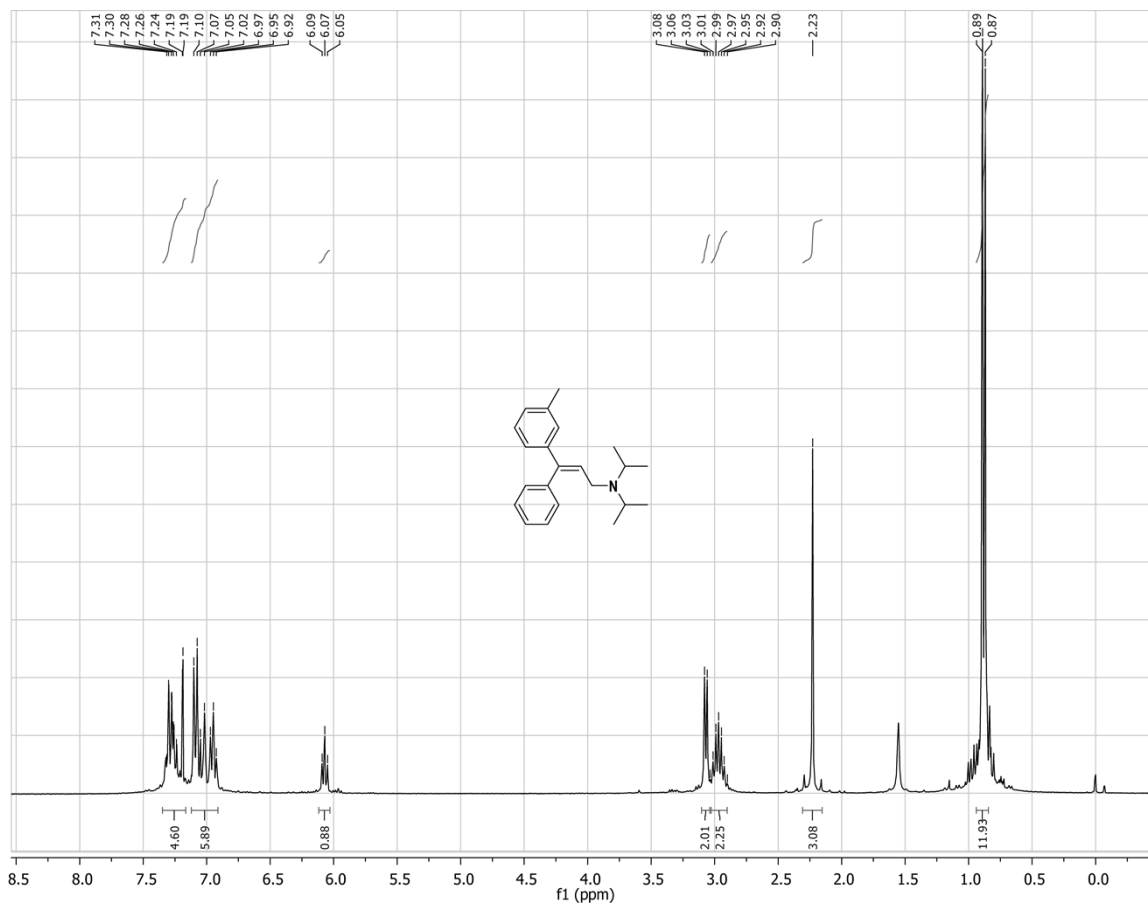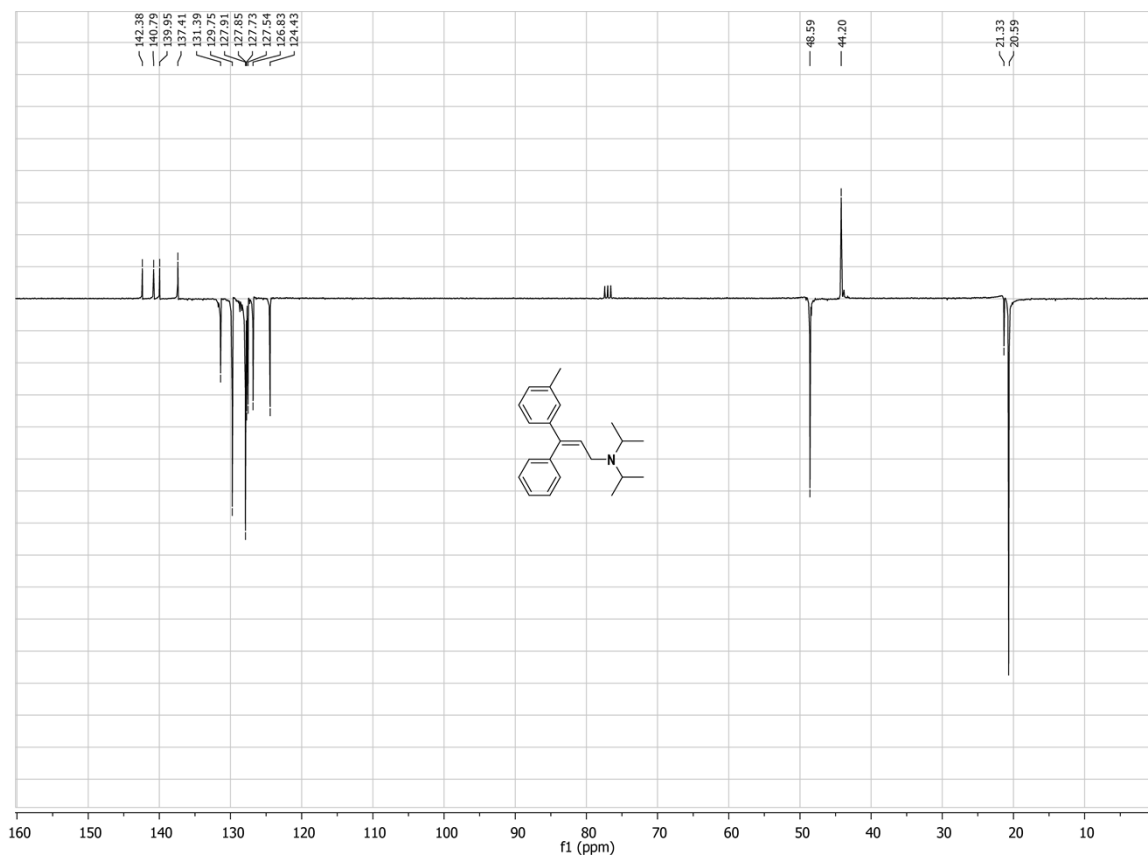

Compound 10a

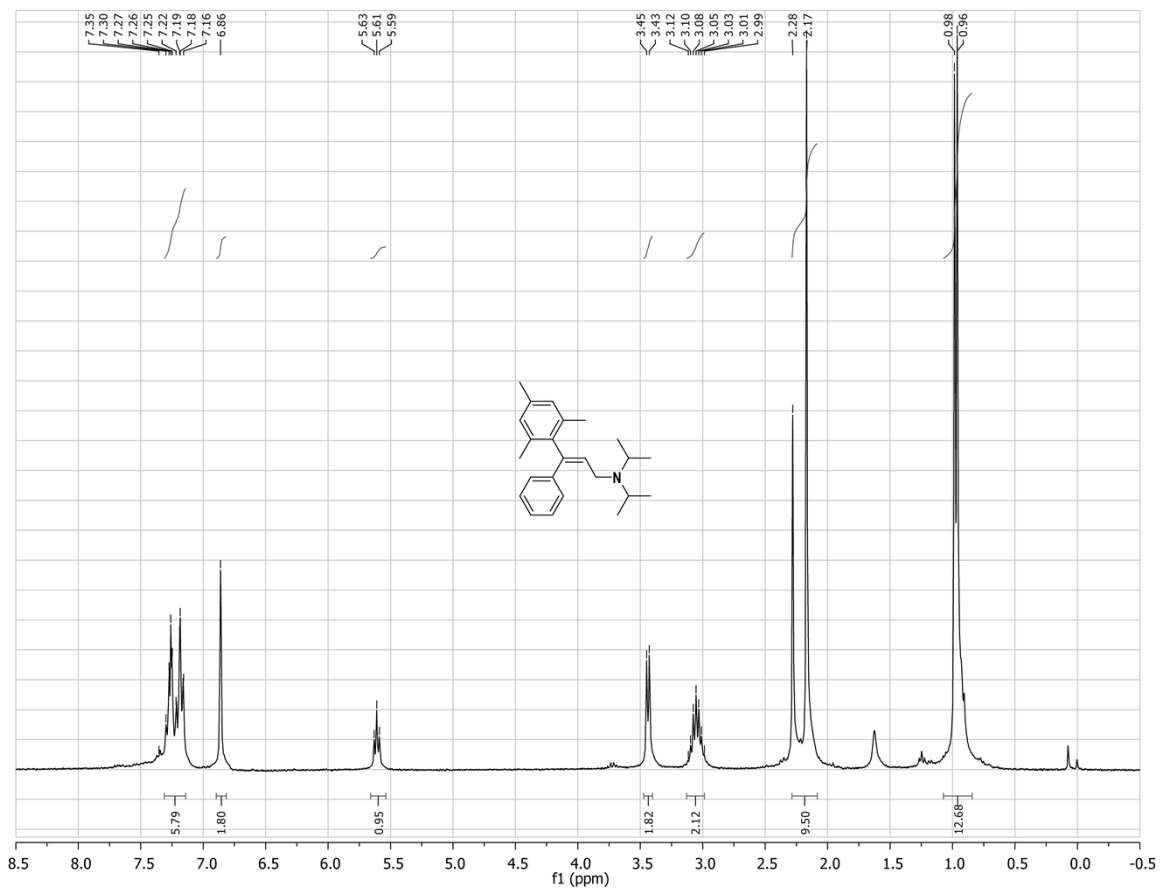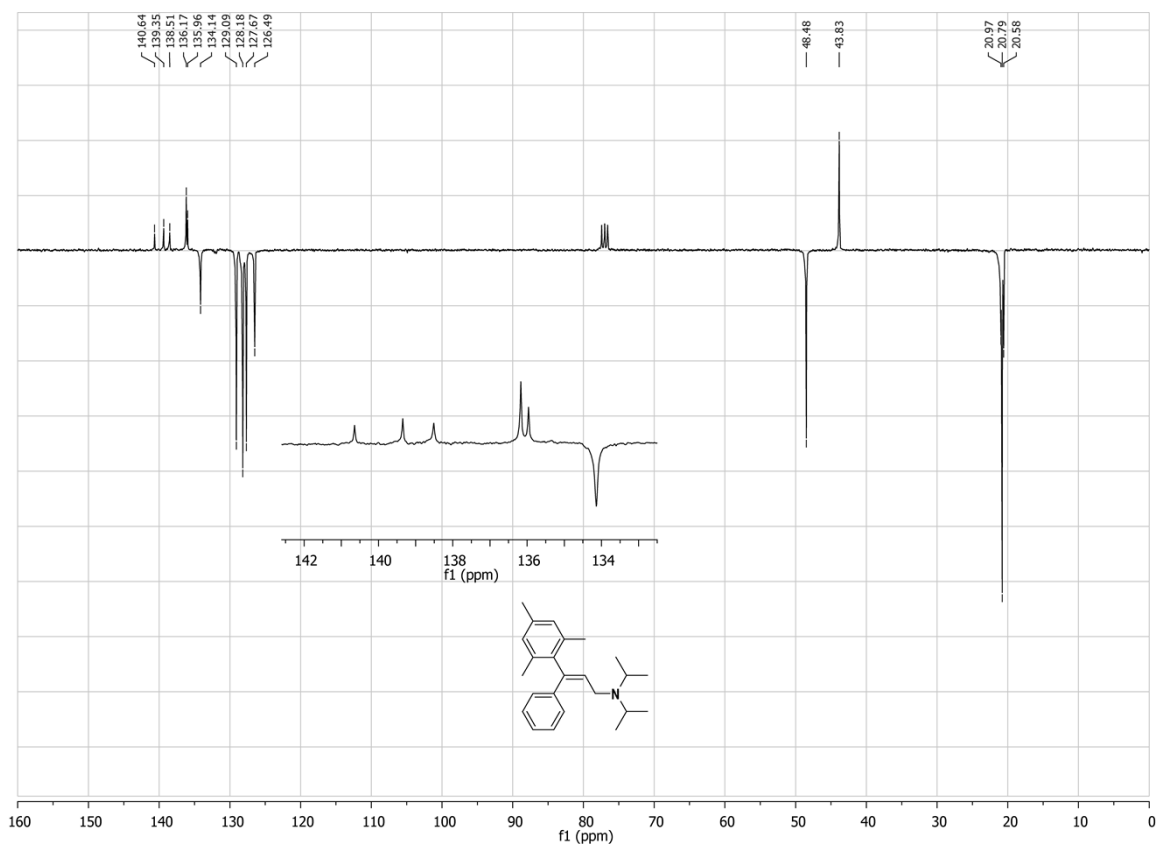

Compound 11a



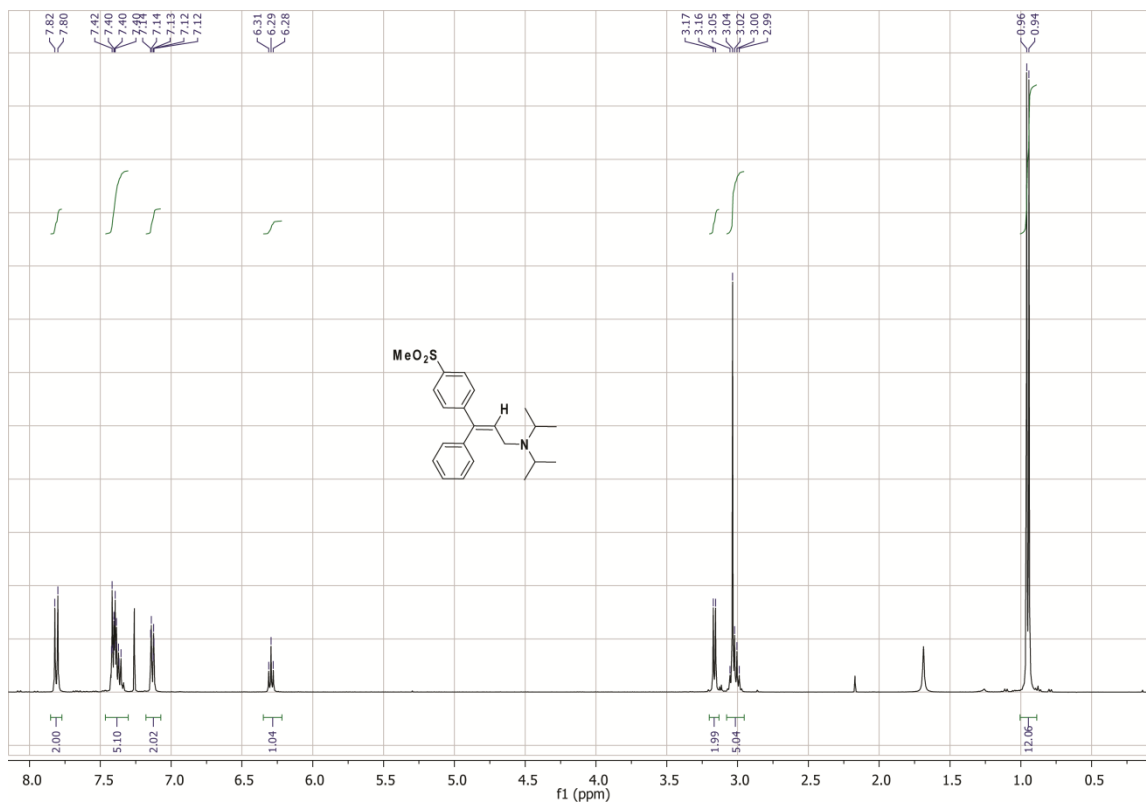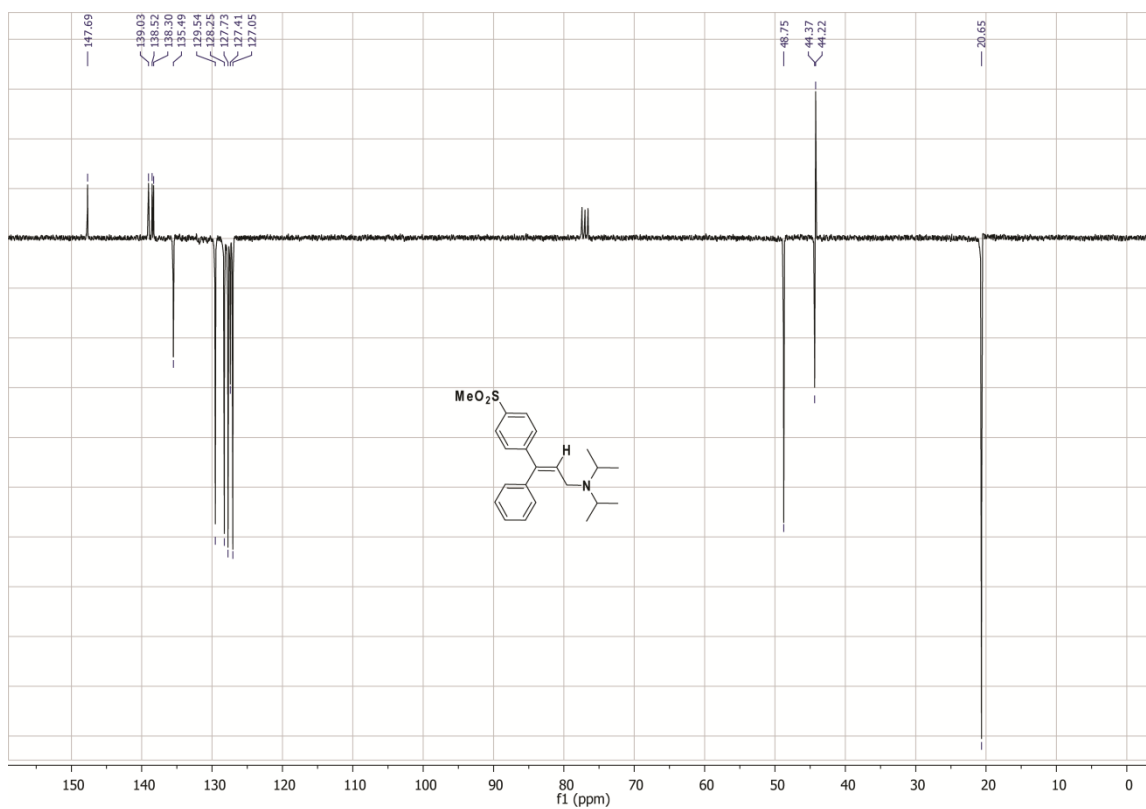

Compound 12a

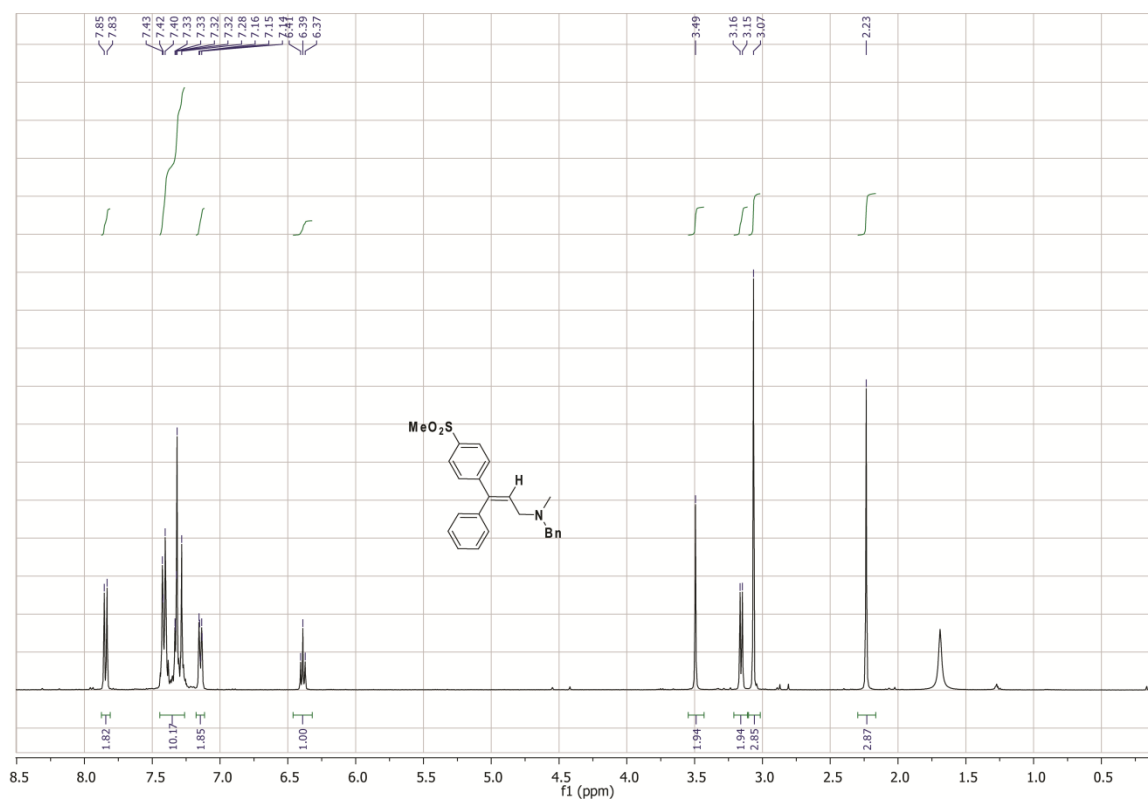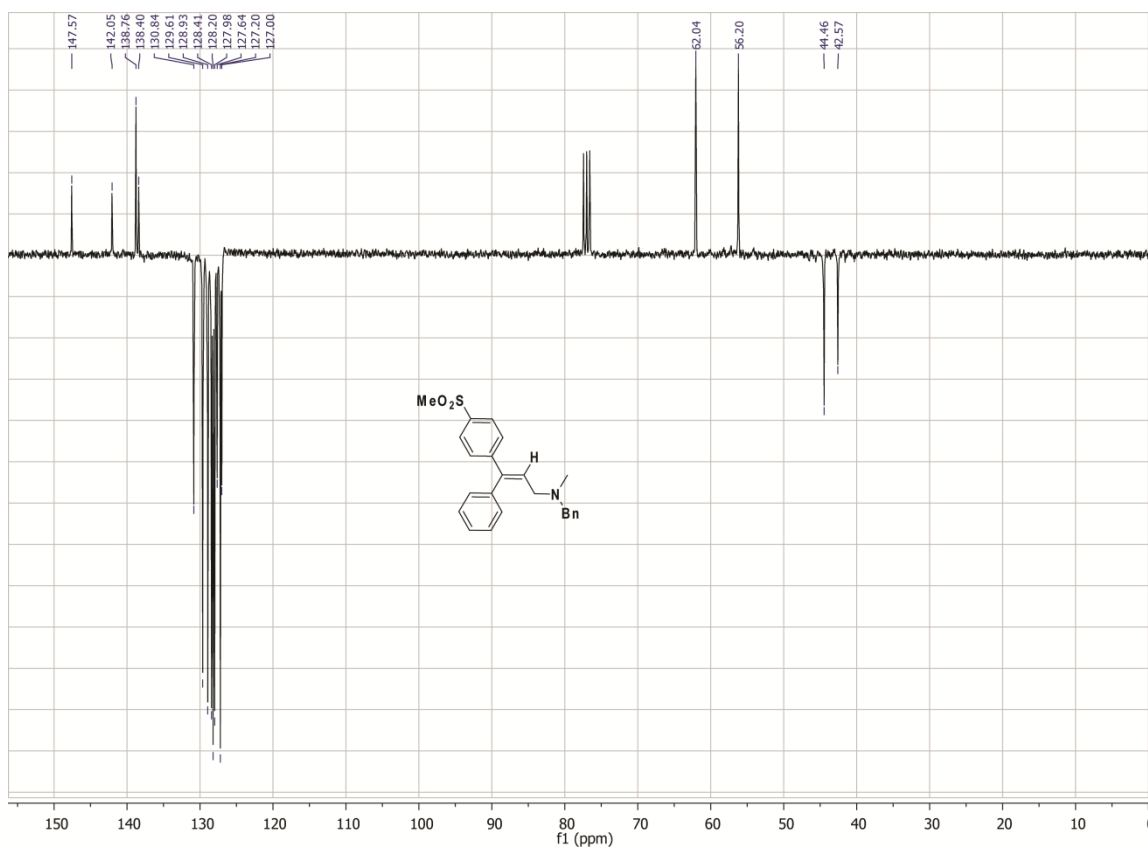

Compound **6b**

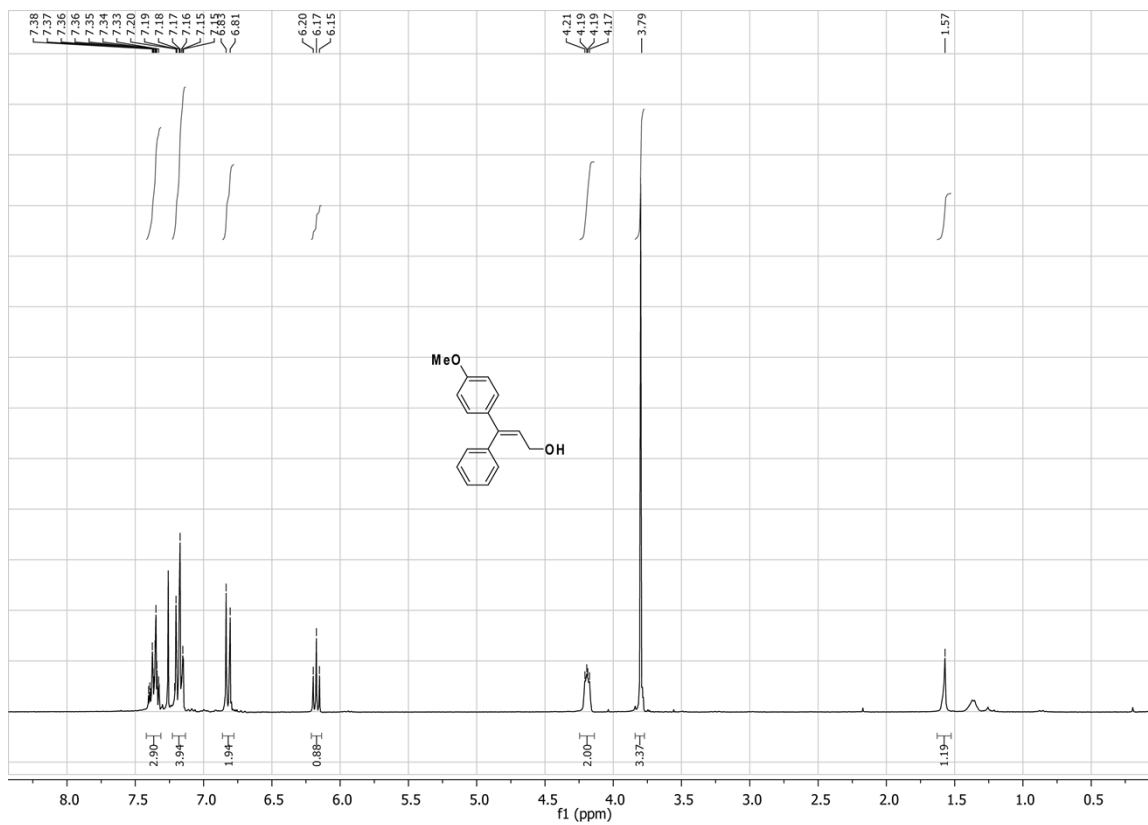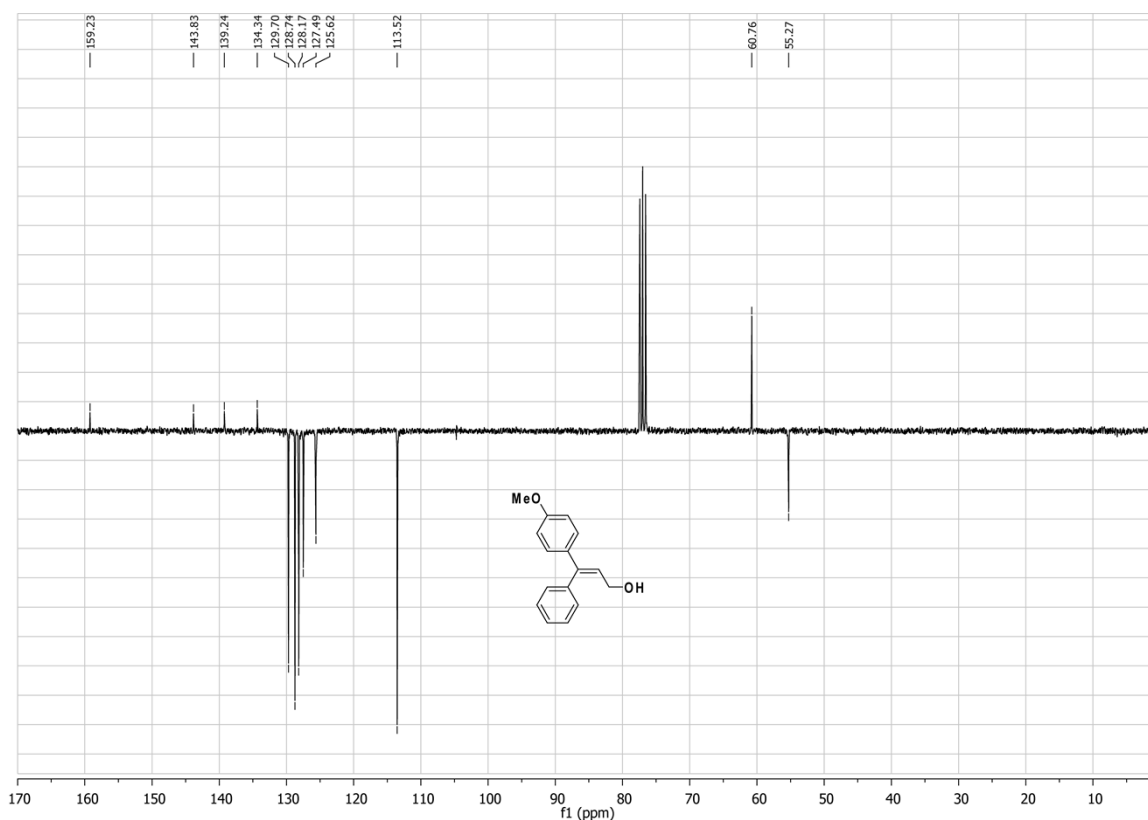

Compound 6c

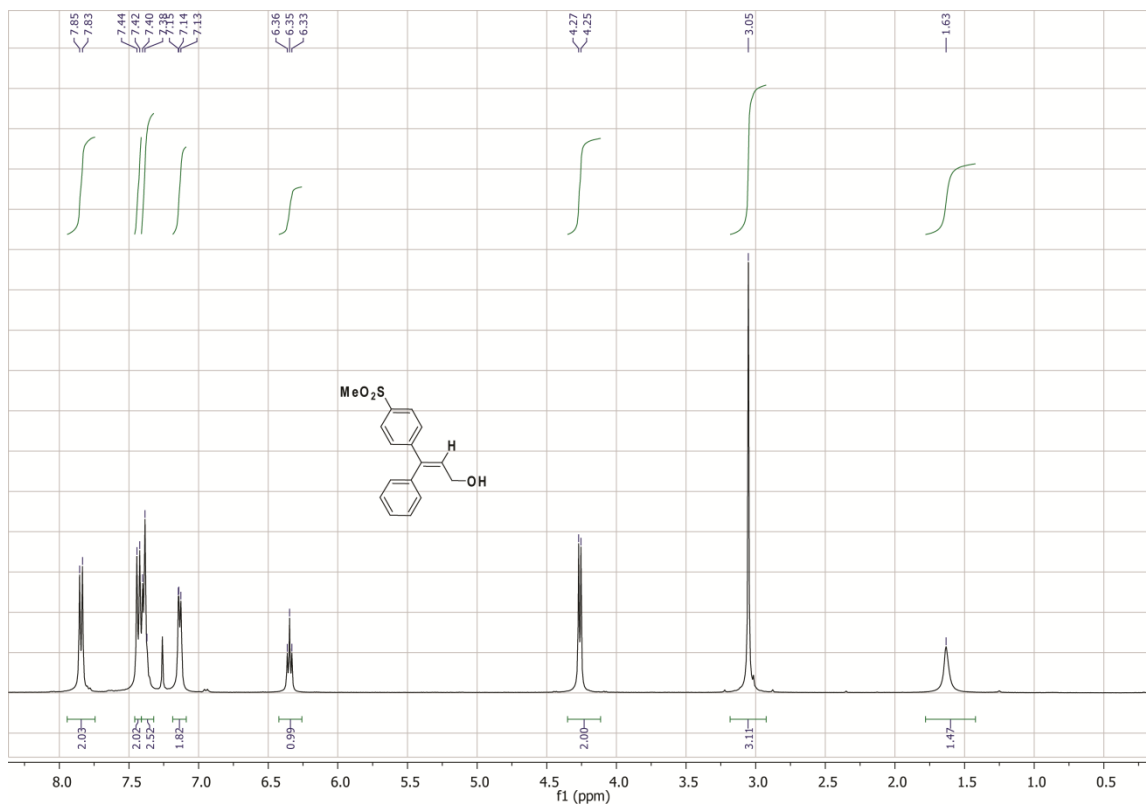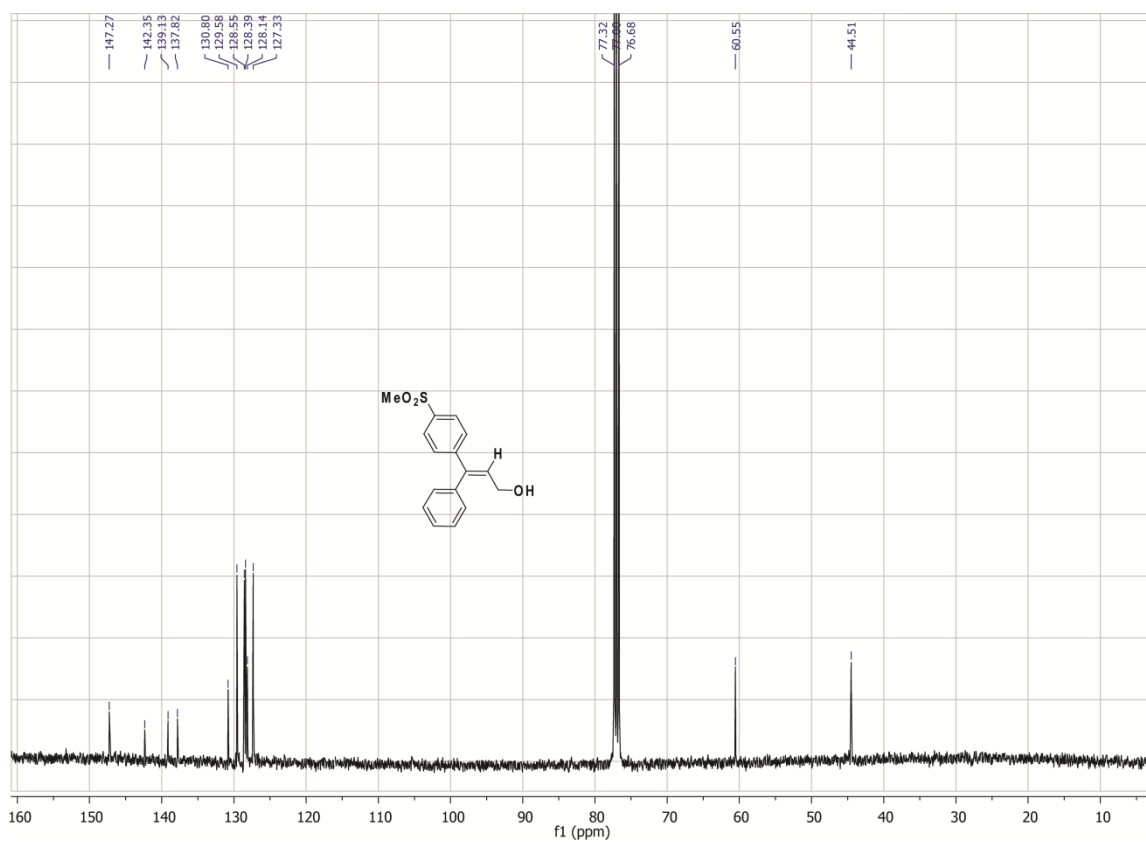

Compound 7c

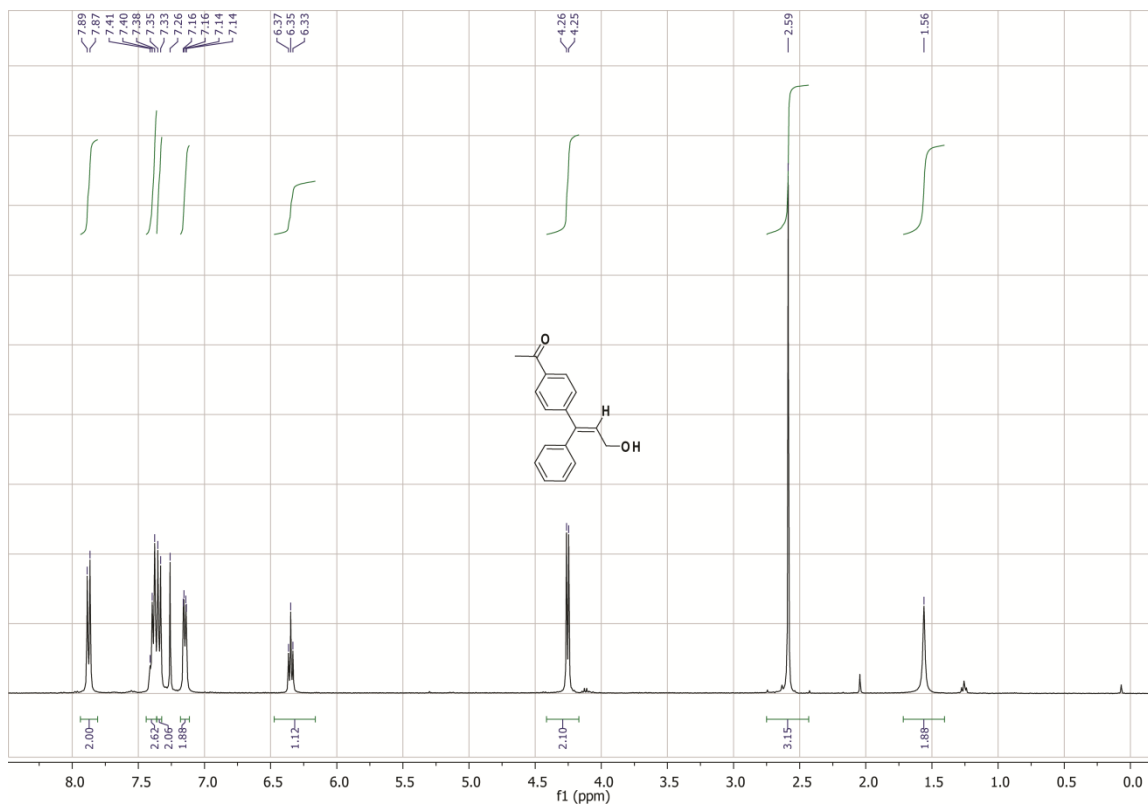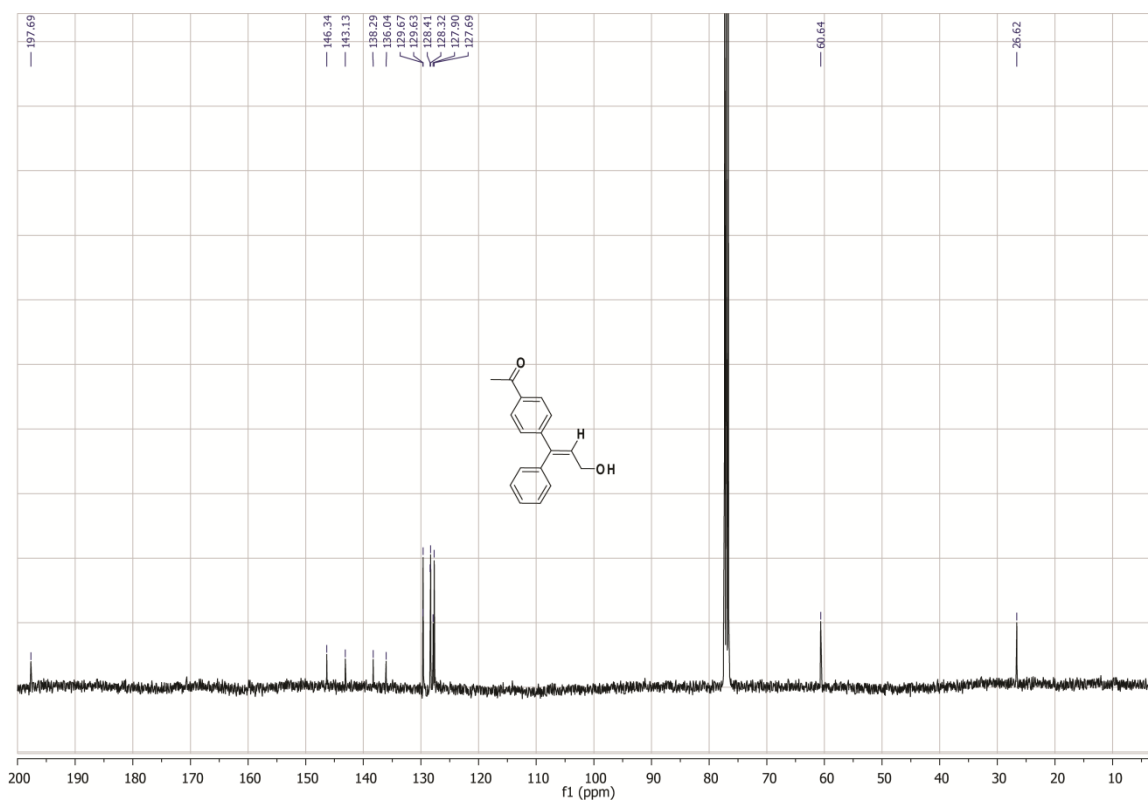

Compound 8c

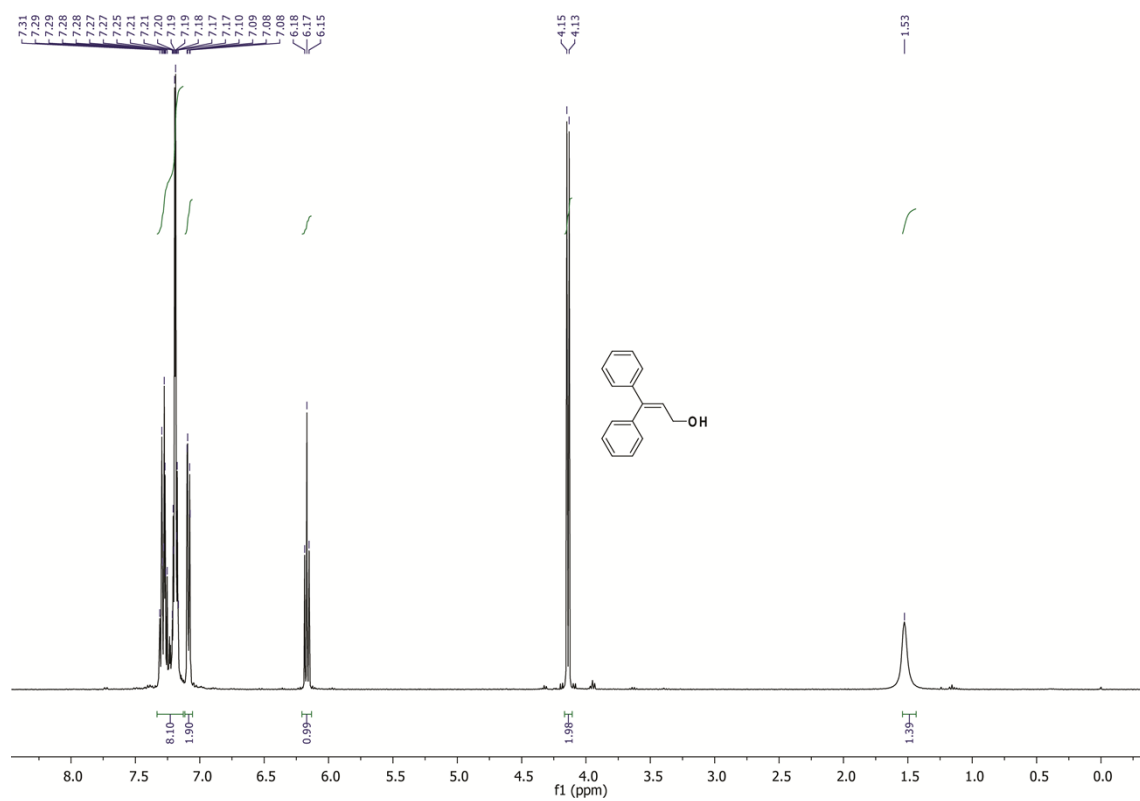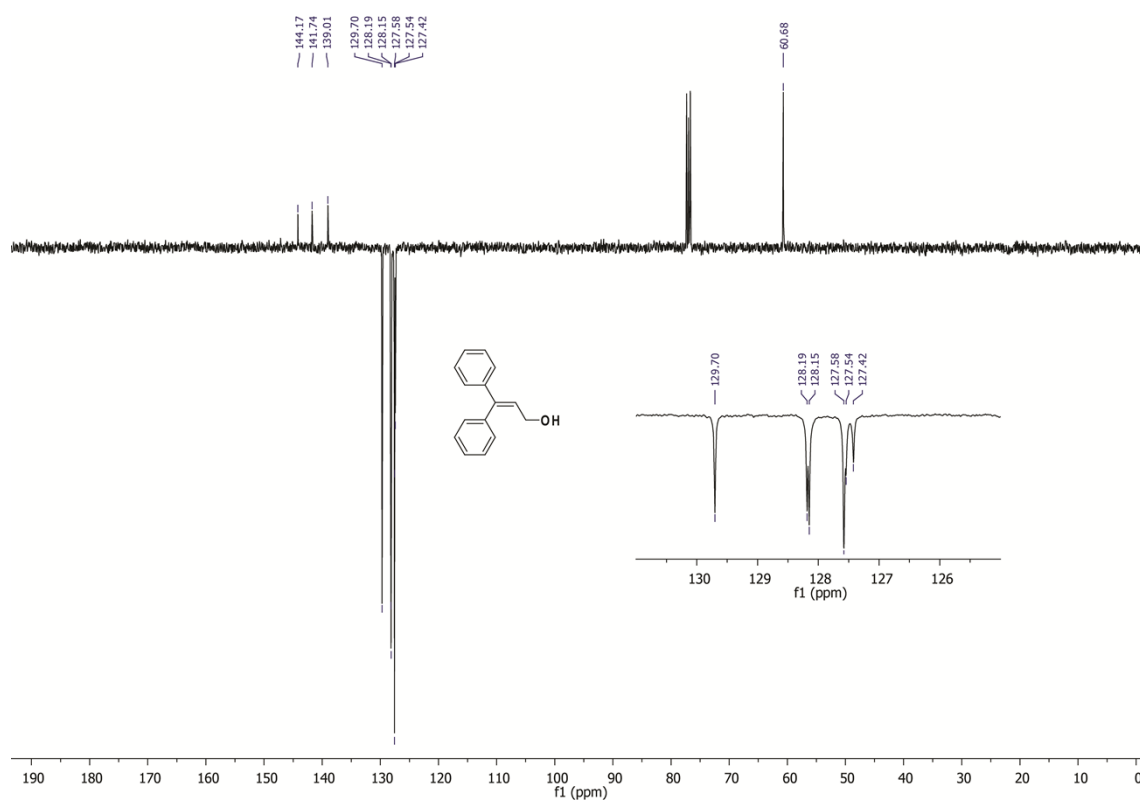

**Compound 9c**

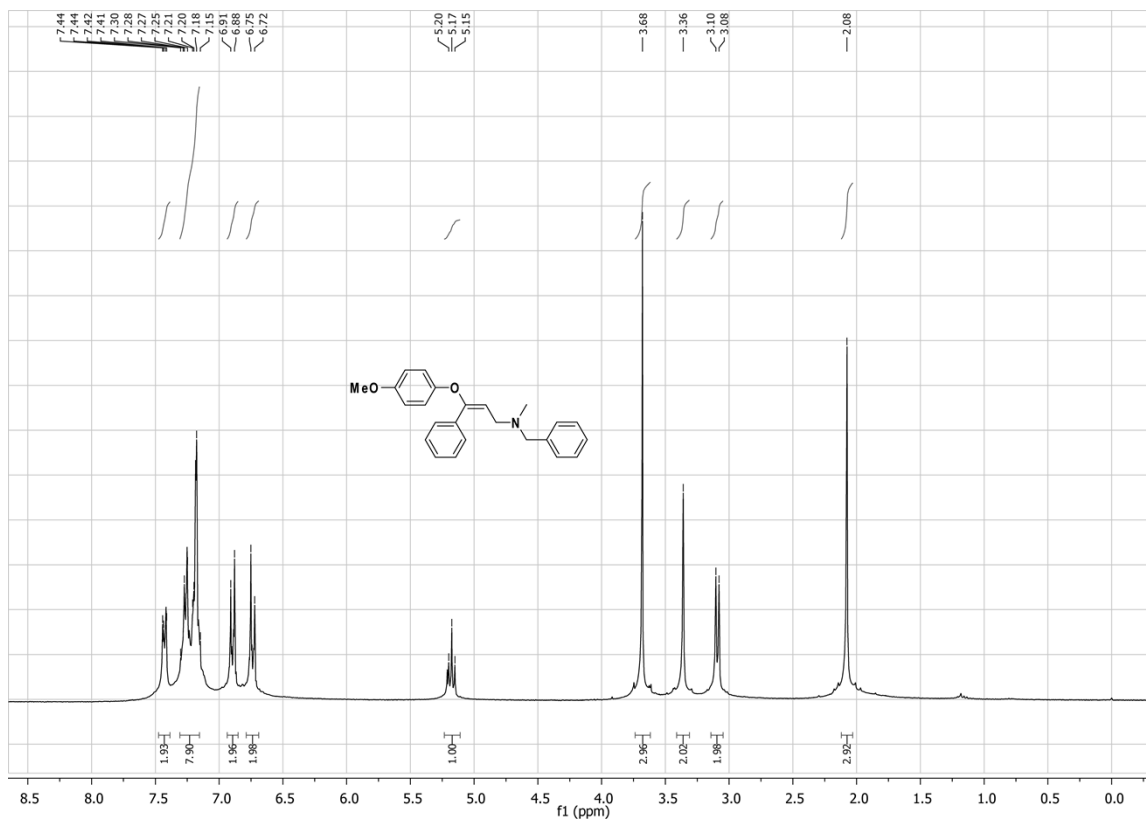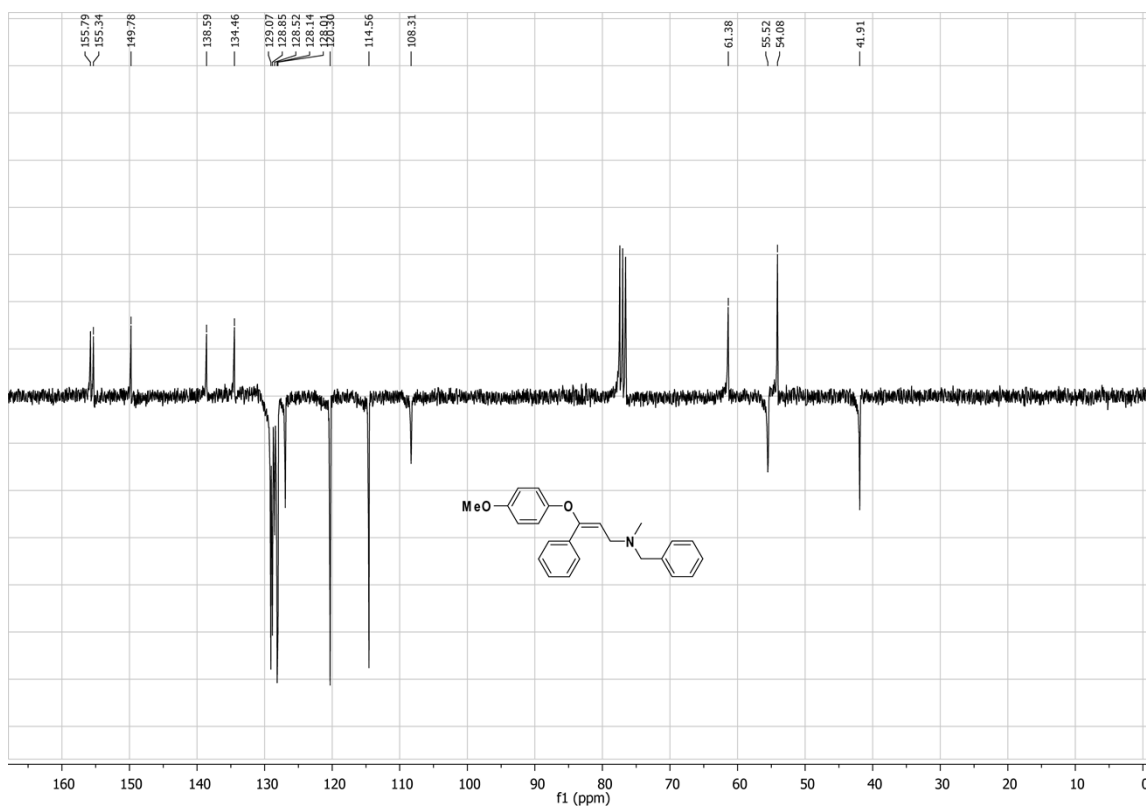

**Compound 8b**

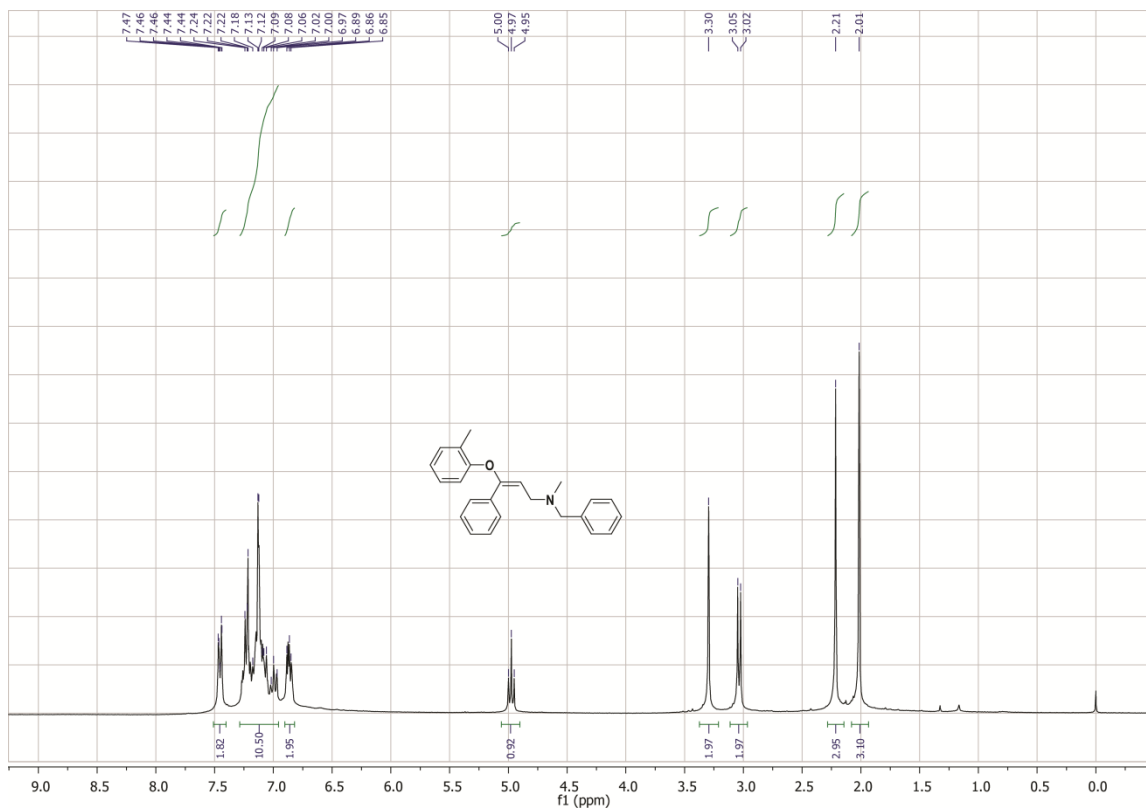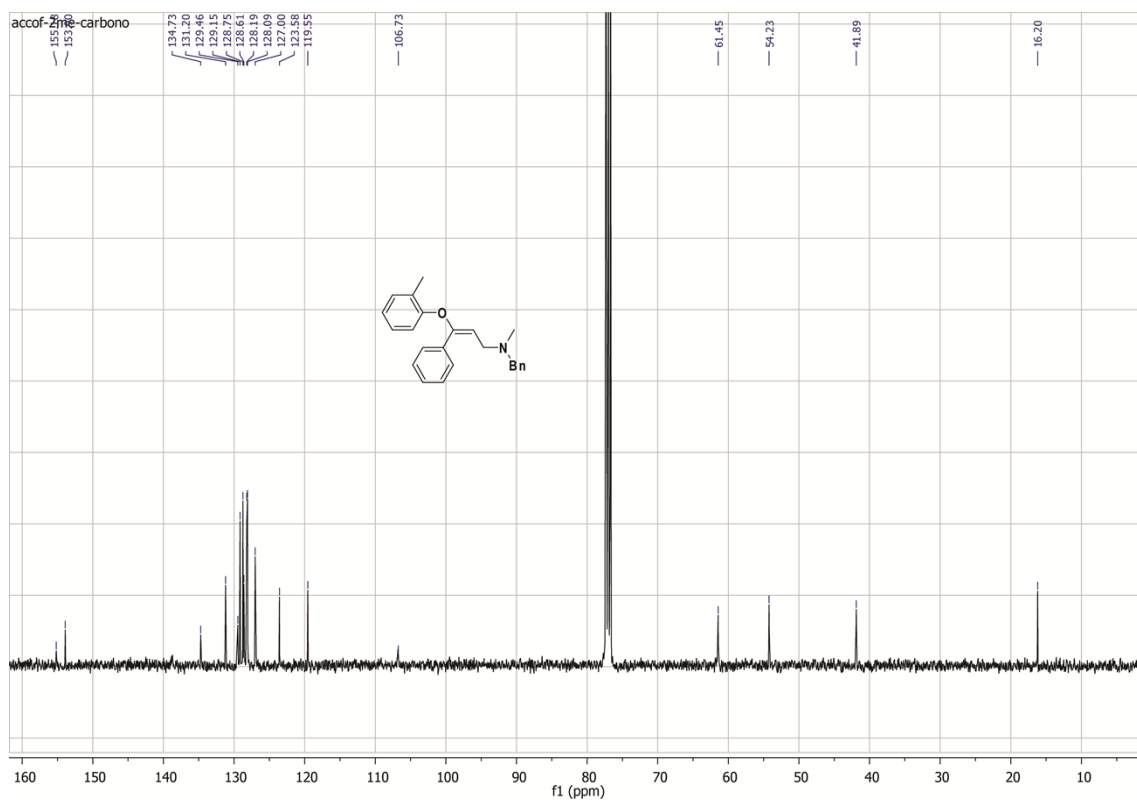

Compound 9b



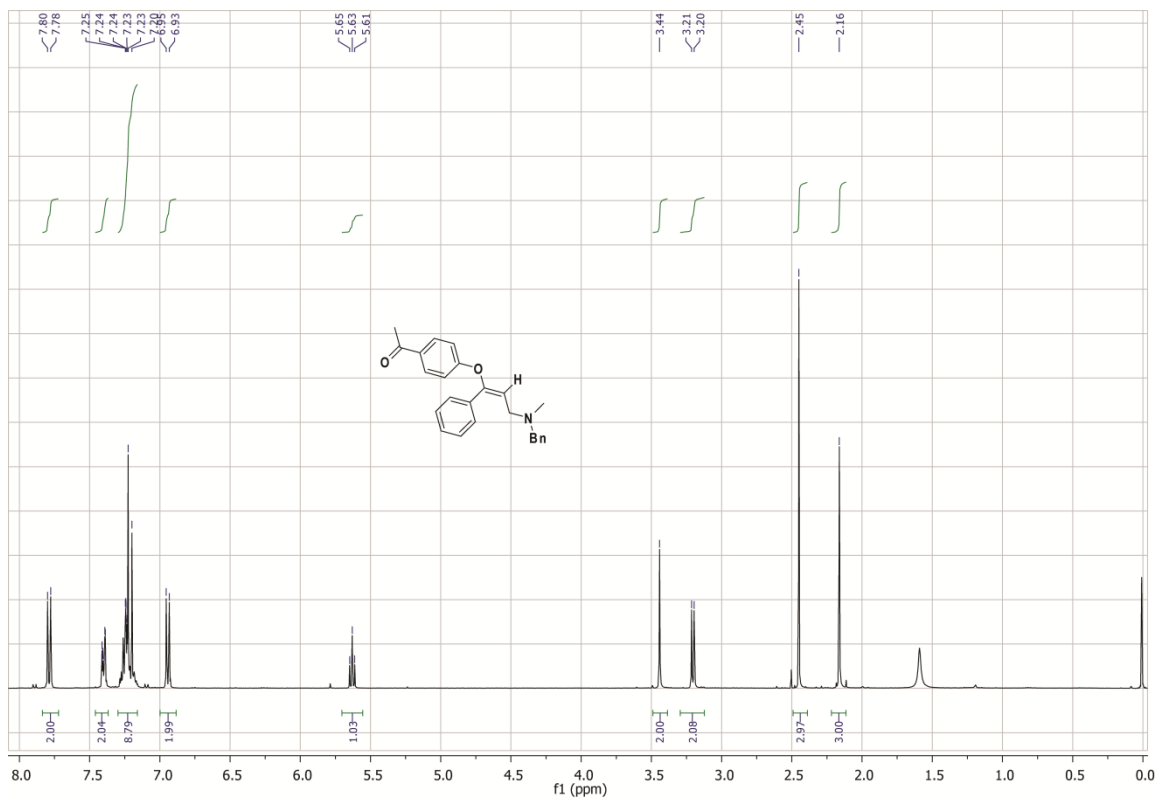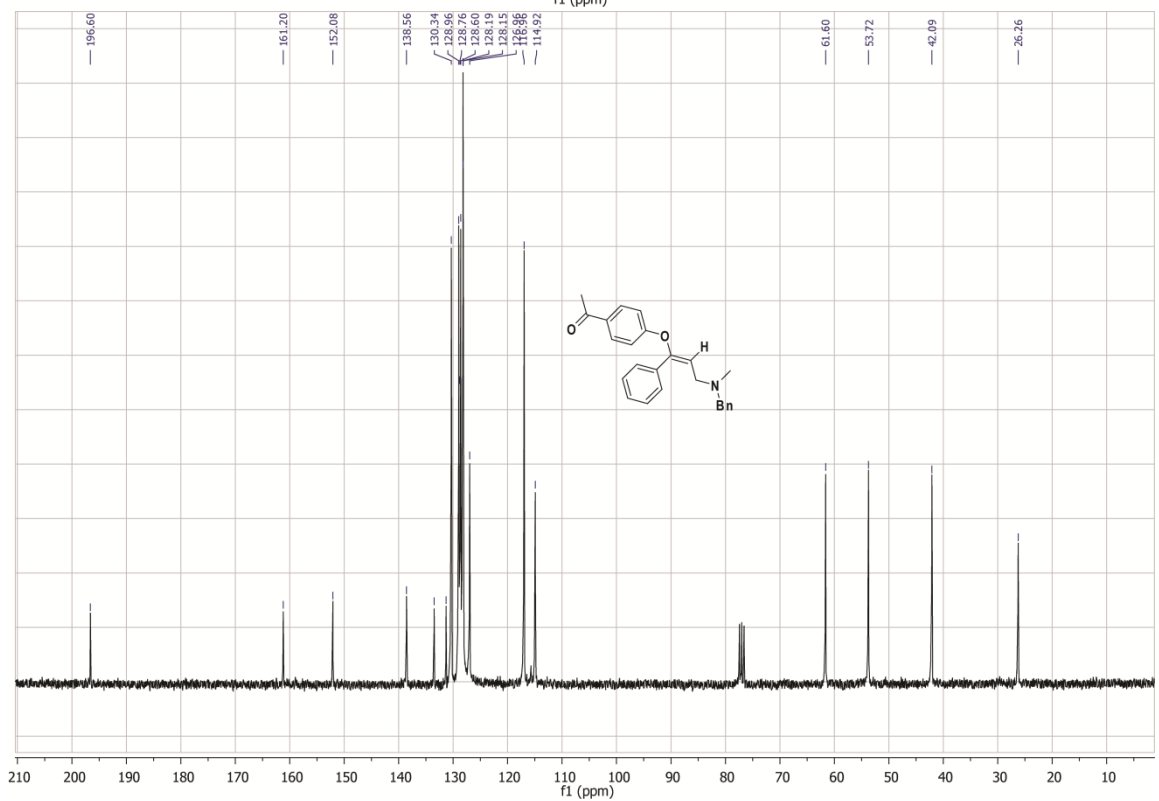

Compound 10b

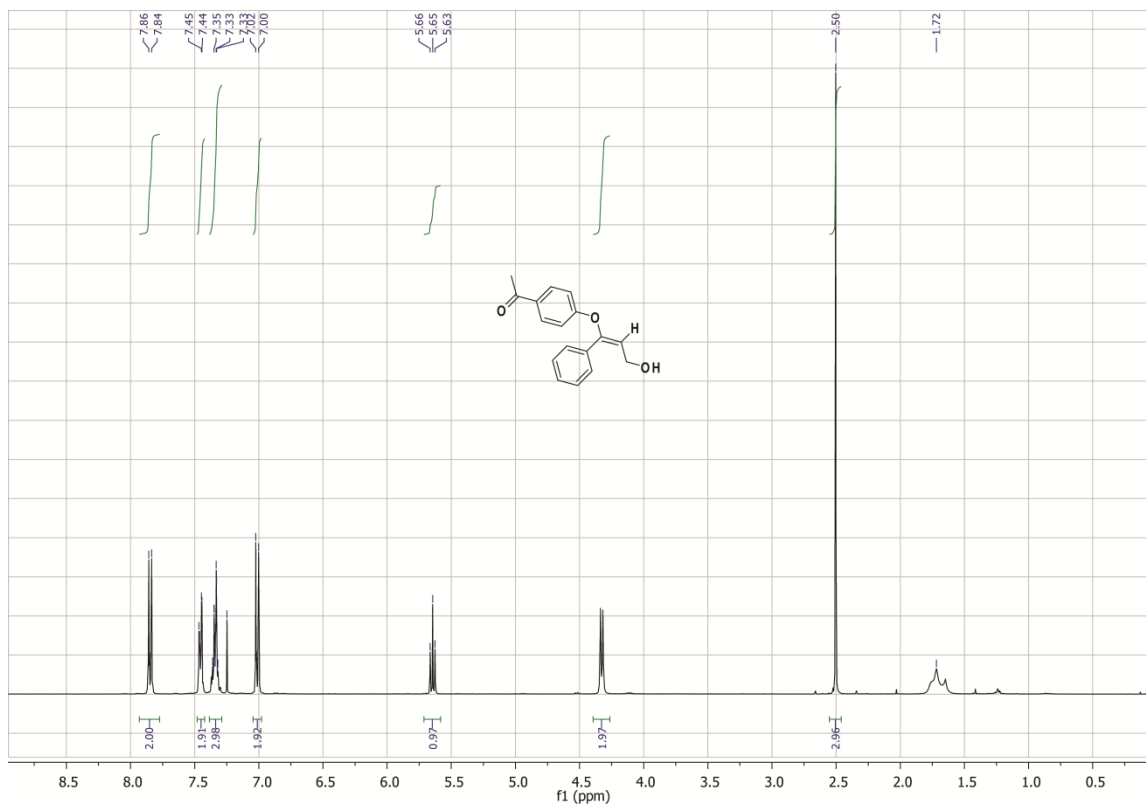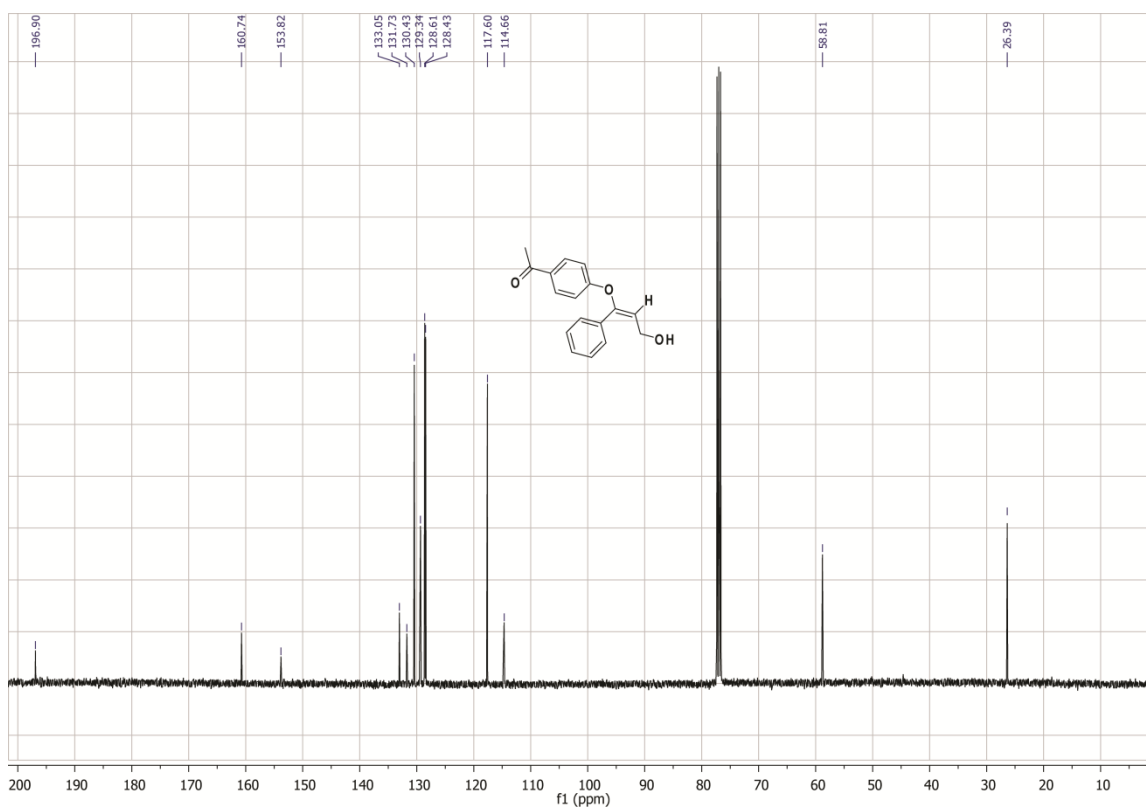

Compound 10c

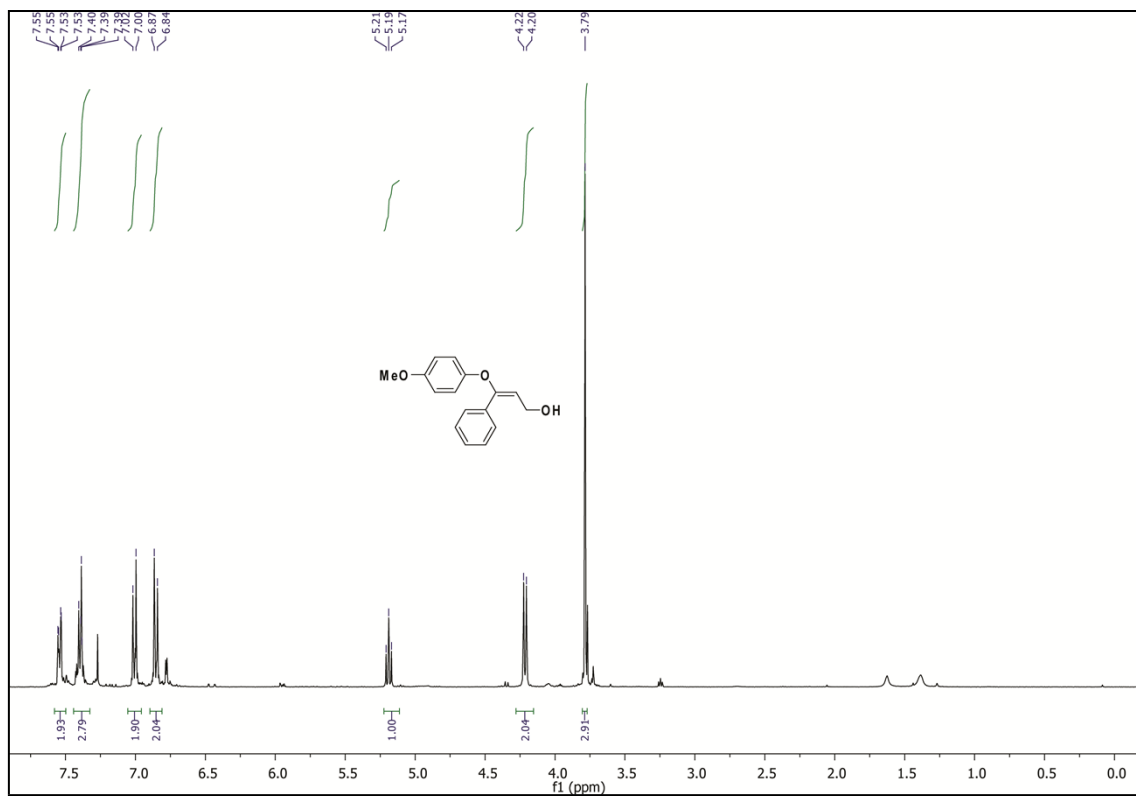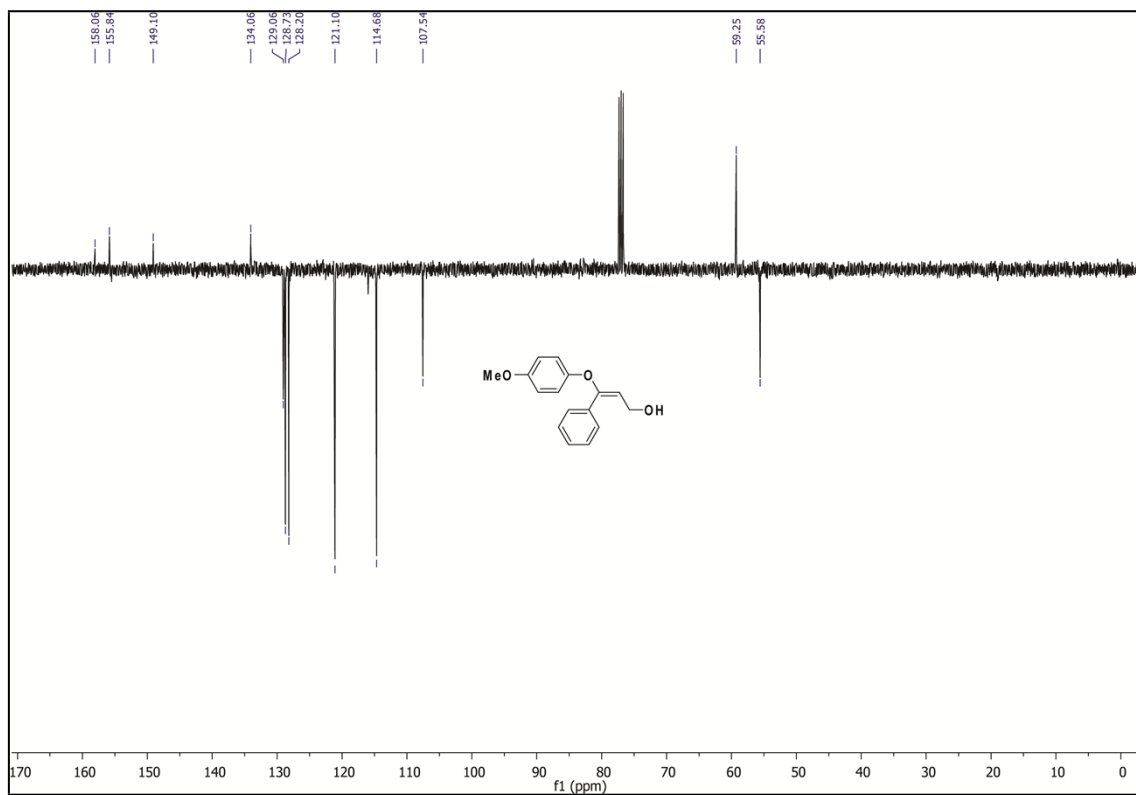

Compound 11c

### 3. NOE Experiments For determination of (*E*)-Configuration of Trissubstituted Products

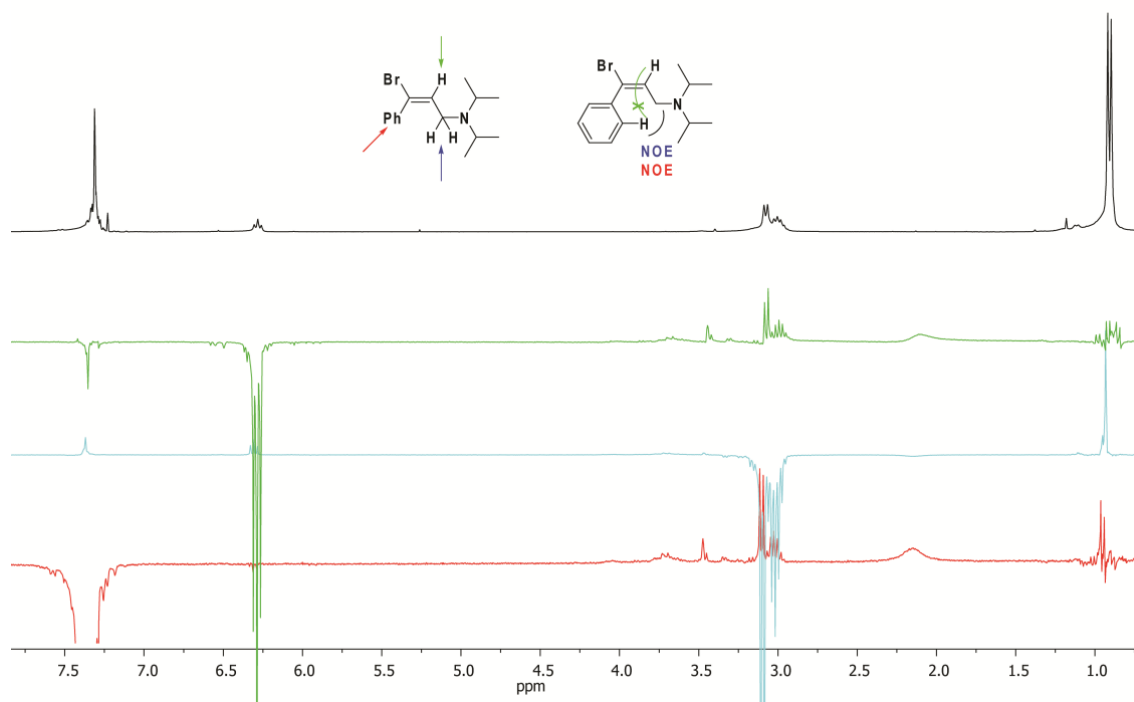

NOE-1D (CycloNoe – Varian 300MHz) Experiment to determine the *E*-configuration of vinyl bromides **5**. When the aromatic hydrogens are saturated, is possible to see NOE correlation with allylic CH<sub>2</sub> (red). When allylic CH<sub>2</sub> is saturated, is possible to see NOE correlation with aromatic hydrogens (blue). When olefinic hydrogen is saturated, no NOE correlation with aromatic is observed.

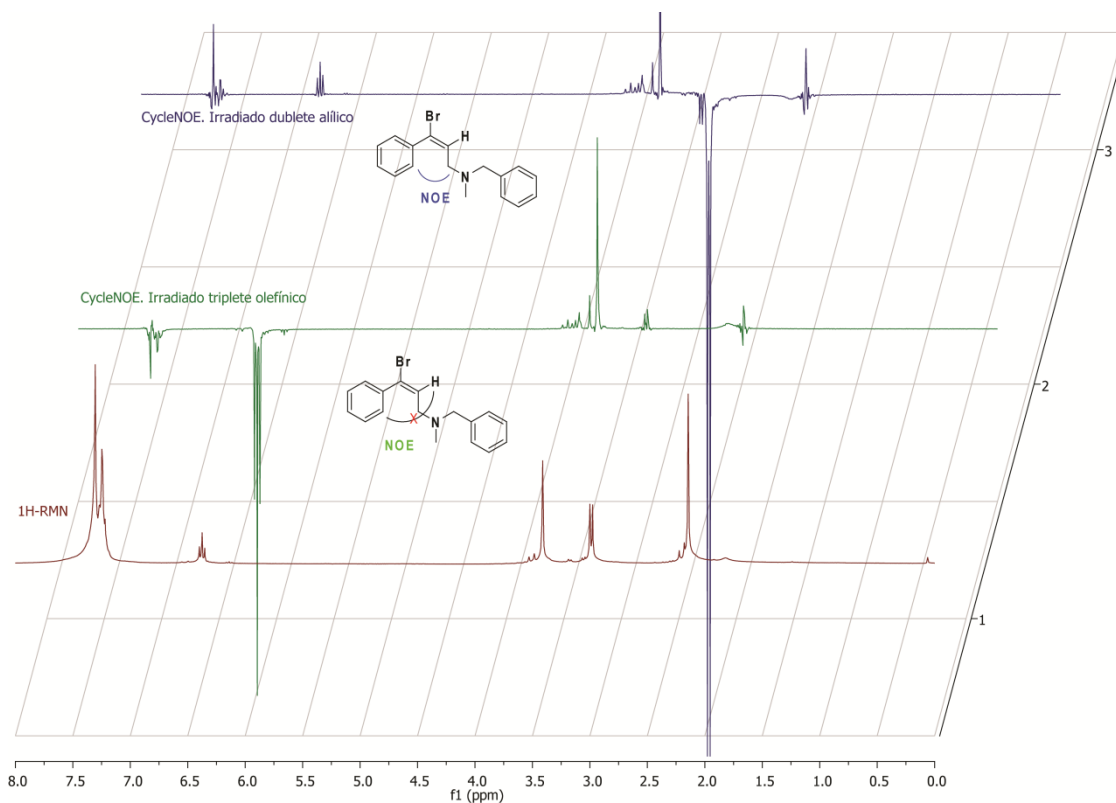

NOE-1D (CycloNoe – Varian 300 MHz) experiment to determine the *E*-configuration of the vinyl bromides **5**. With the saturation of allylic CH<sub>2</sub> is possible to see NOE correlation with aromatic hydrogens (blue). With saturation of olefinic hydrogens, no NOE correlation is observed with aromatics. (green).

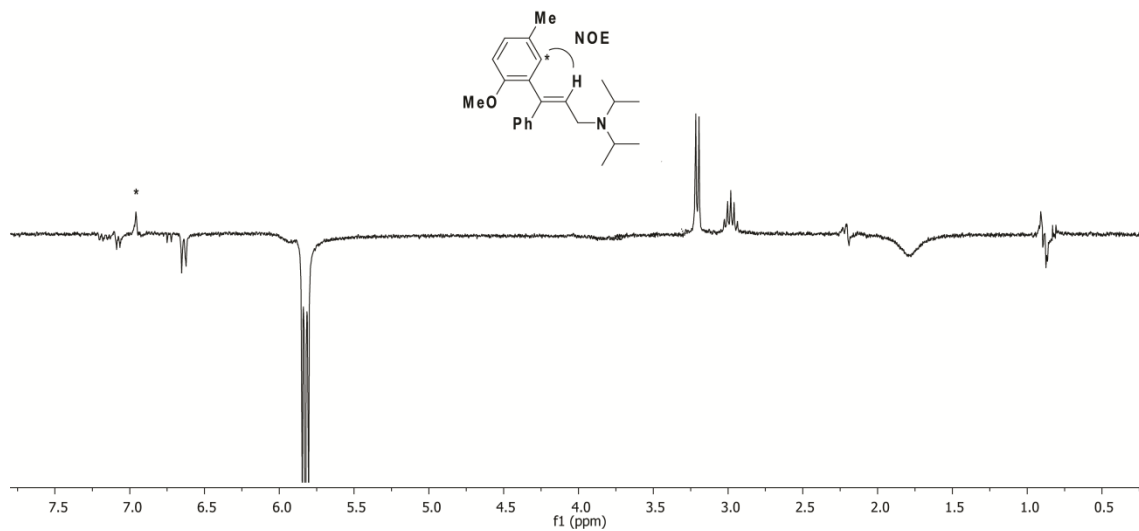

NOE-1D (CycloNoe – Varian 300 MHz) experiment to determine the *E*-configuration of the trisubstituted olefins. With the saturation of the olefinic hydrogen it is possible to note NOE correlation with the aromatic hydrogen singlet ortho-methyl.

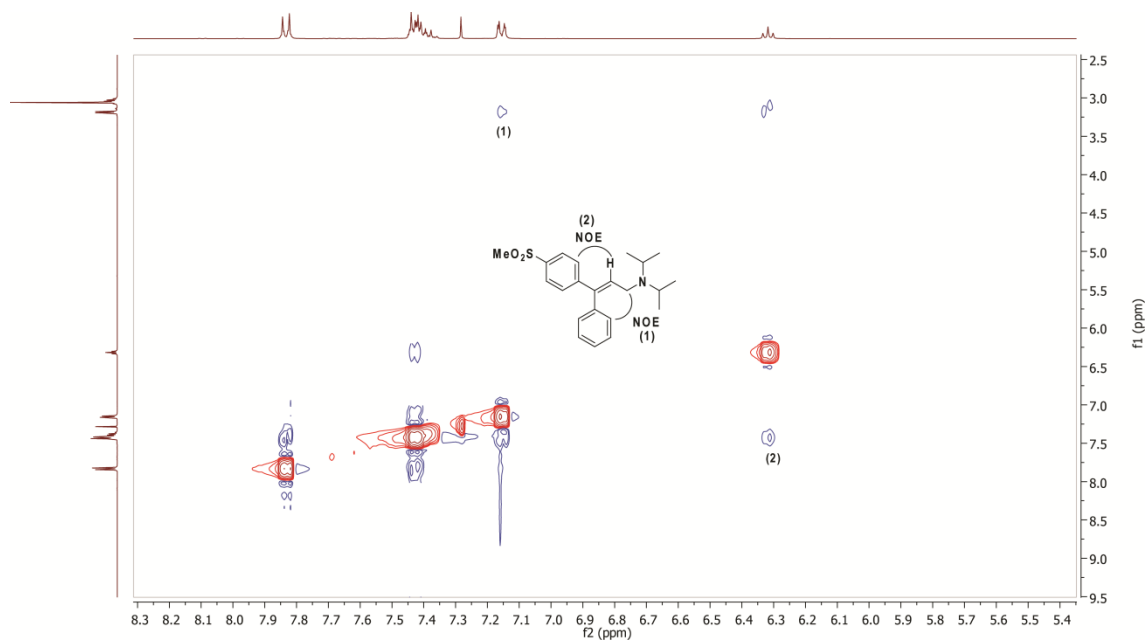

NOE-2D (Varian 400, mixing time 600 ms) experiment to determine the *E*-configuration of the trisubstituted olefins. It is possible to observe NOE correlation between the hydrogens of the SO<sub>2</sub>Me substituted aryl group with the olefinic hydrogen **(2)**. It is also possible to note NOE correlation of phenyl hydrogens and allylic CH<sub>2</sub> **(1)**.

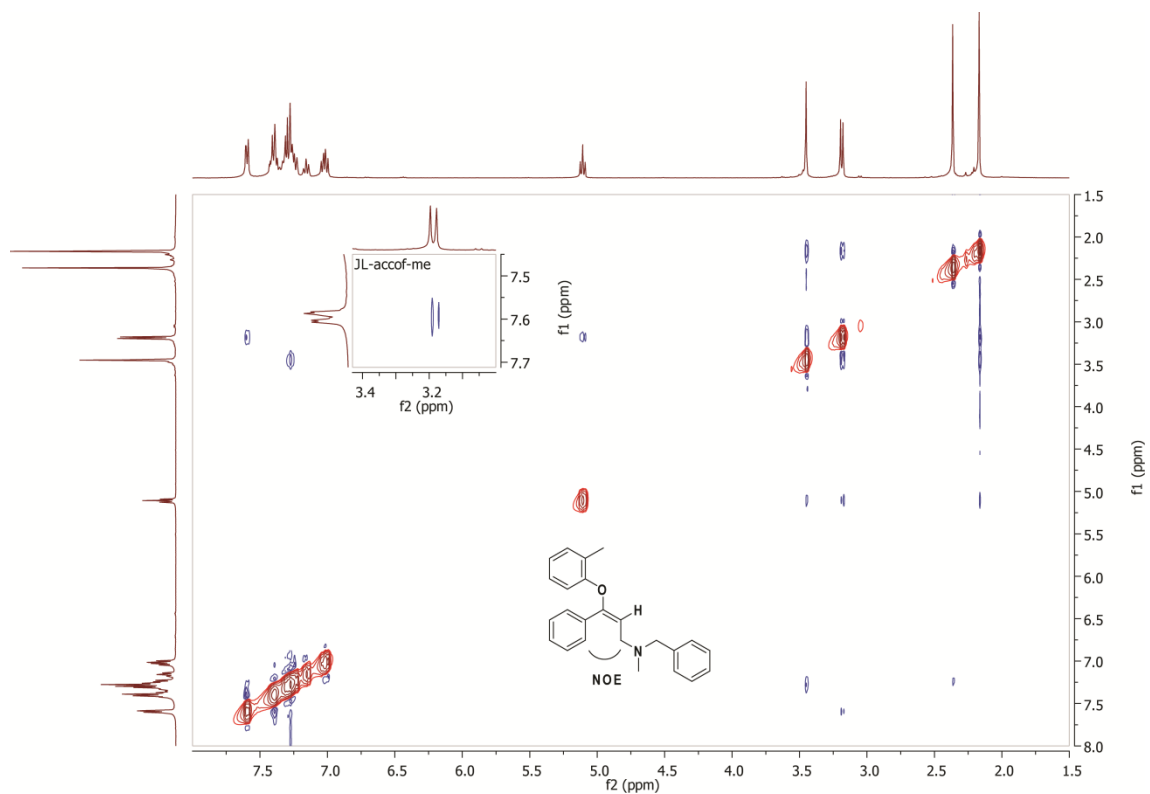

NOE-2D (Varian 400, mixing time 600 ms) experiment to determine the *E*-configuration of the trisubstituted vinyl-ethers. It is possible to observe NOE correlation between allylic CH<sub>2</sub> and hydrogens of the phenyl ring near to oxygen.



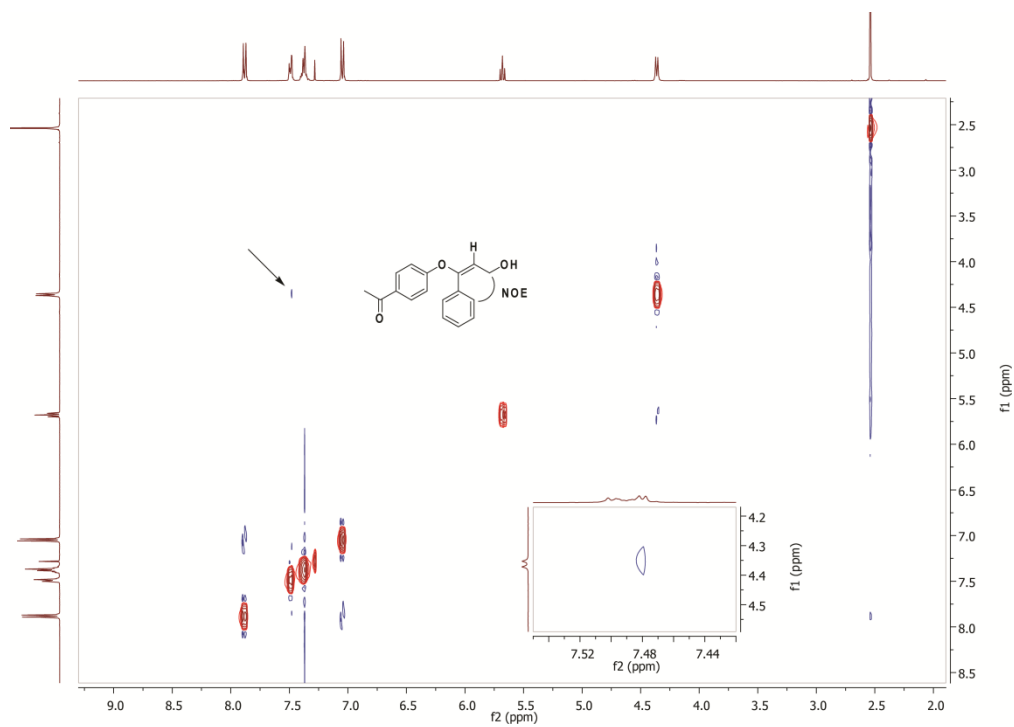

NOE-2D (Varian 400, mixing time 600 ms) experiment to determine the *E*-configuration of the trisubstituted vinyl-ethers. It is possible to observe NOE correlation between allylic CH<sub>2</sub> and hydrogens of the unsubstituted phenyl ring.
